# Supplementary material for: Transcriptional firing helps to drive NETosis
Source: PubMed Central journal article supplement (PMC5296899; doi:10.1038/srep41749), 2017-02-08
Supplement: srep41749-s1.pdf [file srep41749-s1.pdf]

## Supplementary Figures and Tables

### **Transcriptional firing helps to drive NETosis**

**Meraj A Khan<sup>1,2</sup> and Nades Palaniyar<sup>1,2,3</sup>**

<sup>1</sup>Innate Immunity Research Lab, Physiology and Experimental Medicine, PGCRL, The Hospital for Sick Children Research Institute, 686 Bay St, Toronto, Canada M5G 0A4.

<sup>2</sup>Laboratory Medicine and Pathobiology, <sup>3</sup>Institute of Medical Sciences, Faculty of Medicine, University of Toronto, Toronto, Canada.

Correspondence should be addressed to N.P. ([nades.palaniyar@sickkids.ca](mailto:nades.palaniyar@sickkids.ca))

**Running title: Transcriptional firing drives NETosis**

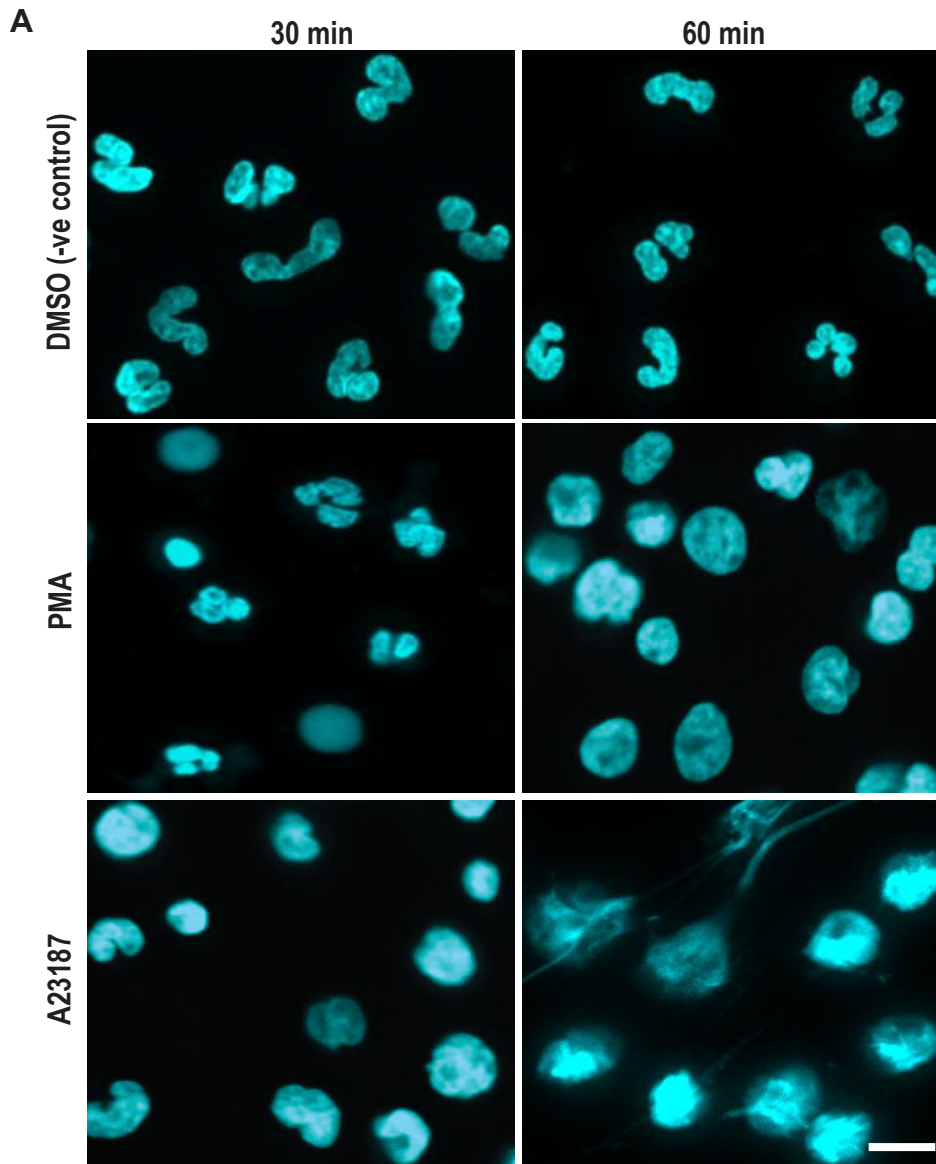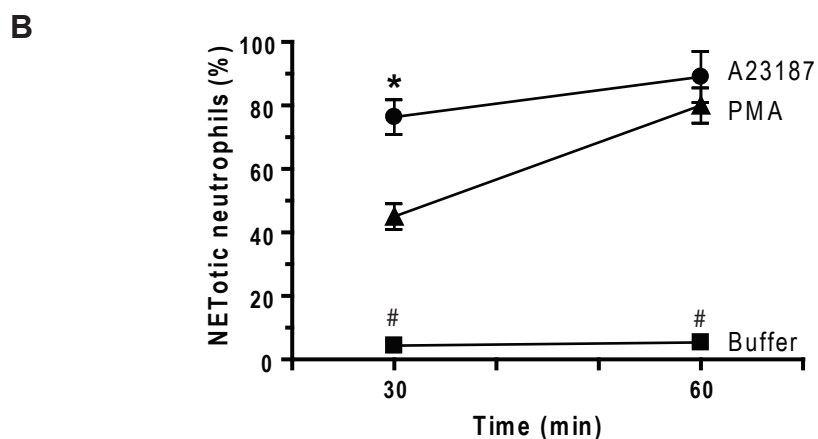

**Figure S1. Nuclear decondensation is faster in Nox-independent than Nox-dependent NETosis. (A)** Confocal microscopy images show that DNA (blue, DAPI) decondenses rapidly in A23187-mediated Nox-independent NETosis compared with PMA-mediated Nox-dependent NETosis. **(B)** Manual count of the NETotic nuclei (delobulated + fully decondensed + NET releasing). Images from three independent experiments were used; n=74-112 nuclei/condition. \* indicates the difference between PMA and A23187 conditions at each time point; # indicates the difference between the agonists (PMA or A23187) from their respective controls (p<0.05; 2-way ANOVA with Bonferroni post-test).

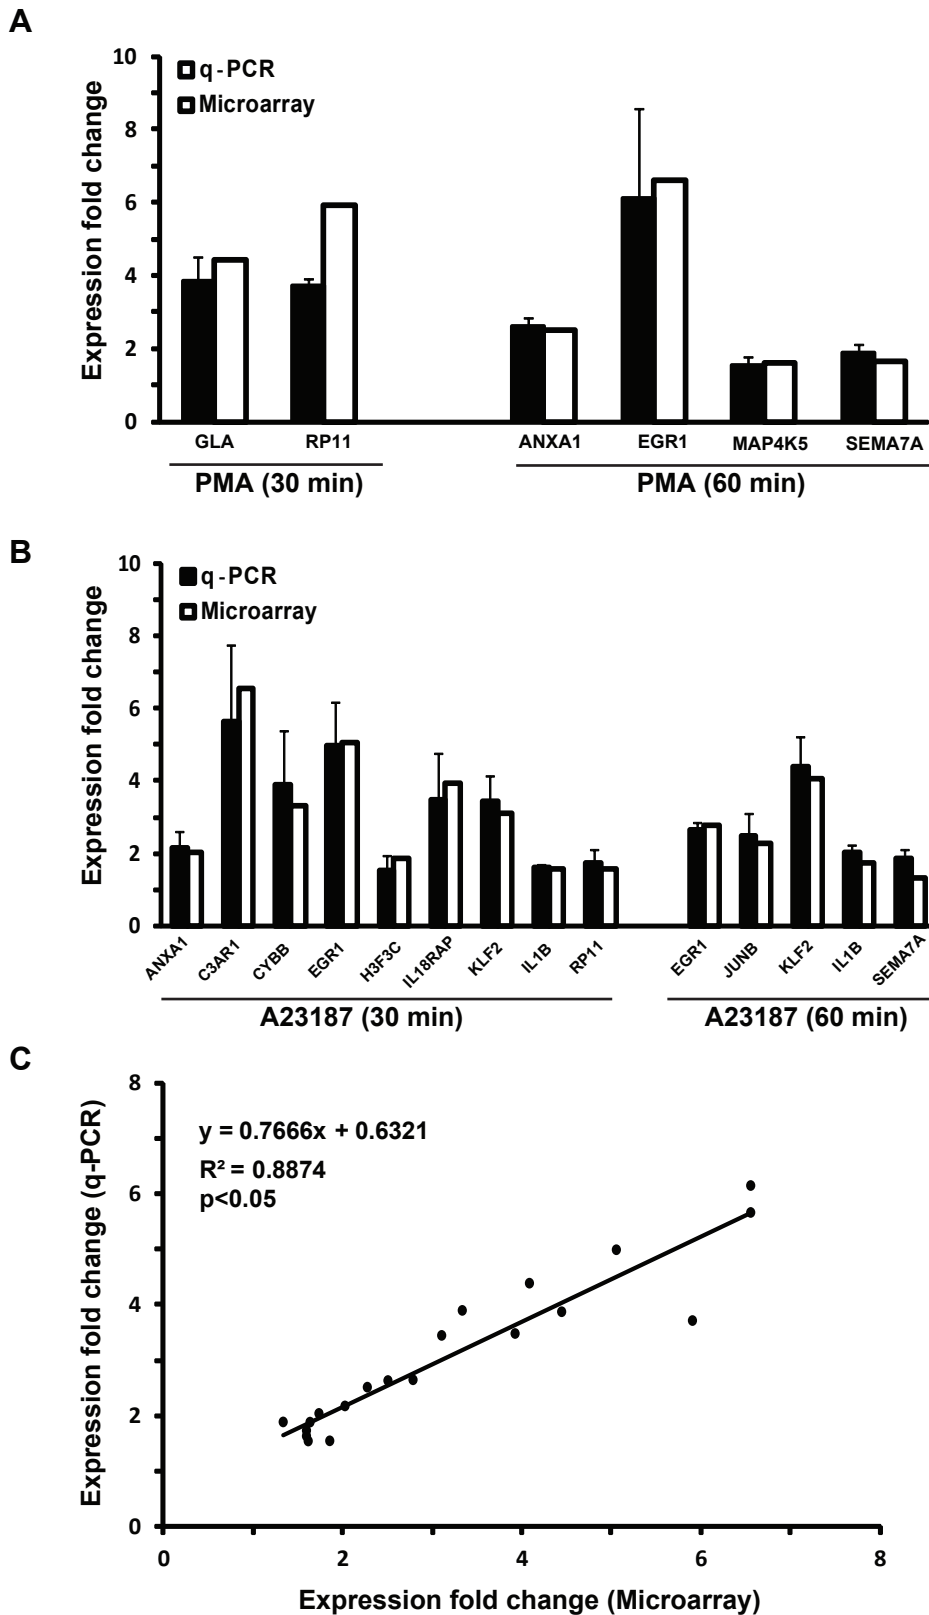

**Figure S2. Validation of the expression of selected transcripts by q-PCR.**

The fold change expression analysis was performed by threshold cycle ( $\Delta\Delta C_t$ ) method. GAPDH (housekeeping gene) was used for standardizing target transcripts. **(A)** The expression profiles of genes obtained by q-PCR (filled bar) and microarray (open bar) in neutrophils treated with PMA at 30- and 60-min time points. **(B)** As of (A), but for A23187 treated cells. **(C)** The linear regression analysis between q-PCR and microarray data for all data points shown in (A) and (B). Details of the primers are given in Supplementary Table S1. (n=3)

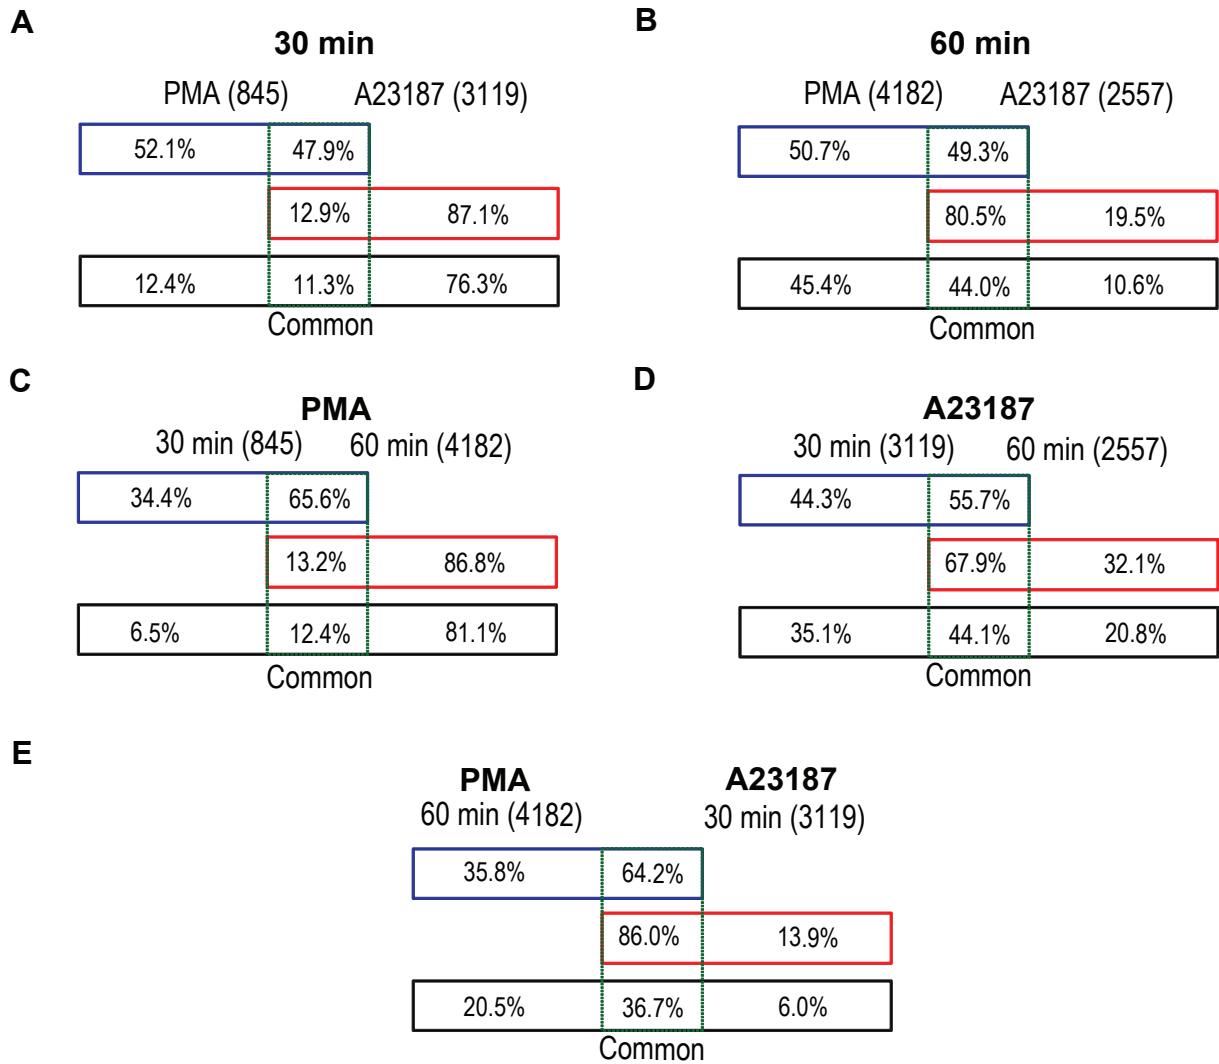

**Figure S3. Percentage overlap in transcripts.** The percentages of common and unique transcripts (coding and non-coding genes) showing  $\geq 1.5$  fold expression have been calculated based on each group, along with the total in both groups (shown in Figure 2).

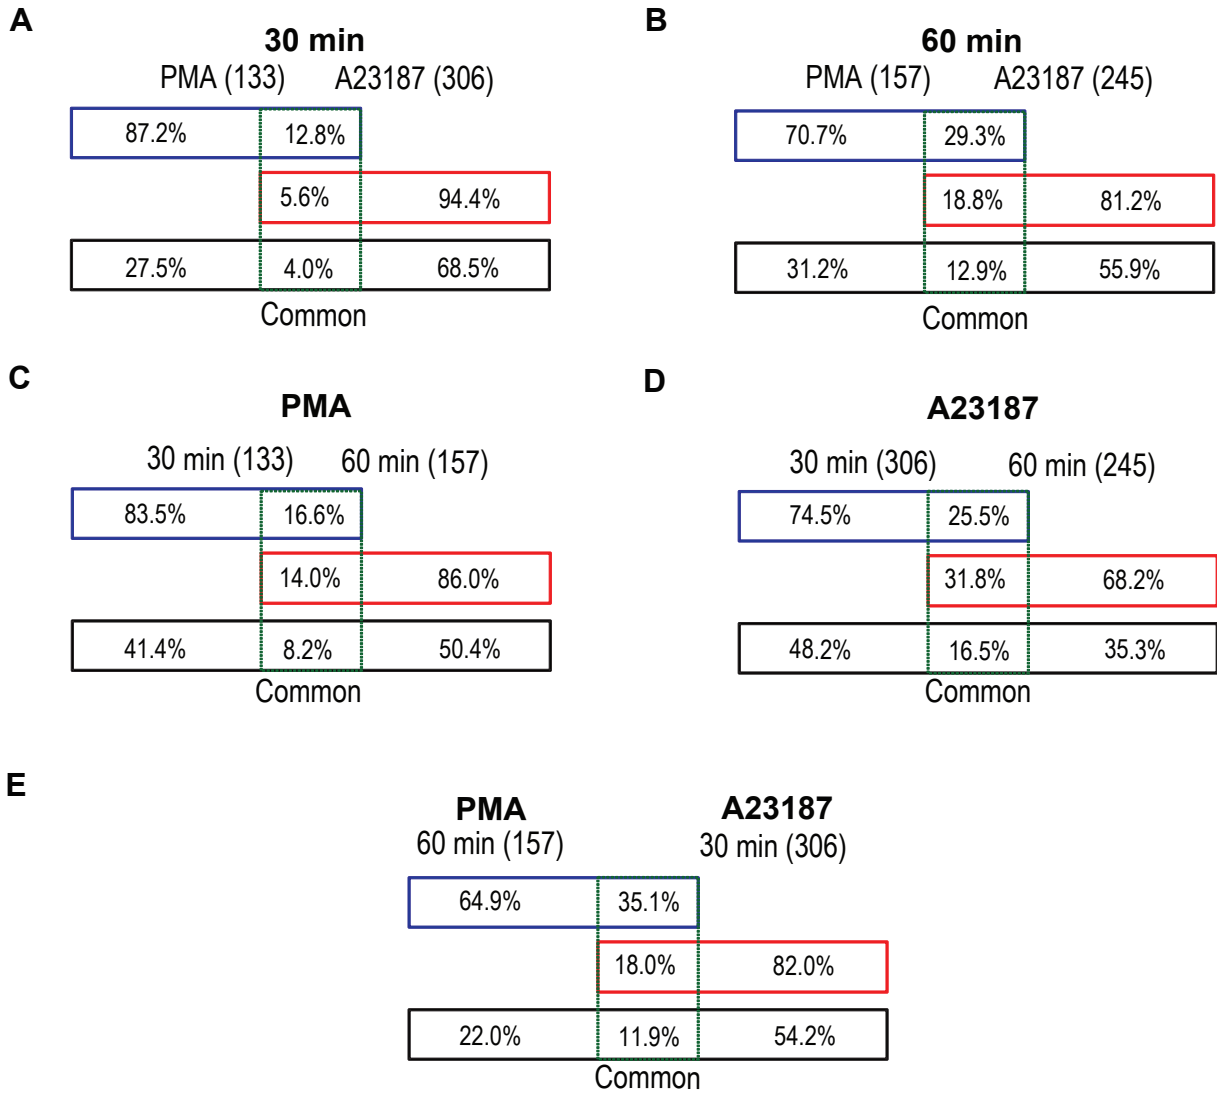

**Figure S4. Percentage overlap in differentially expressed transcripts.** The percentages of common and unique transcripts of coding genes showing  $\geq 1.5$  fold expression with  $p < 0.05$  have been calculated based on each group, along with the total in both groups (shown in Figure 3).

**NOX-dependent NETosis  
(PMA)**

**NOX-independent NETosis  
(A23187)**

**Actinomycin D (Promoter melting inhibitor, suppresses transcription initiation)**

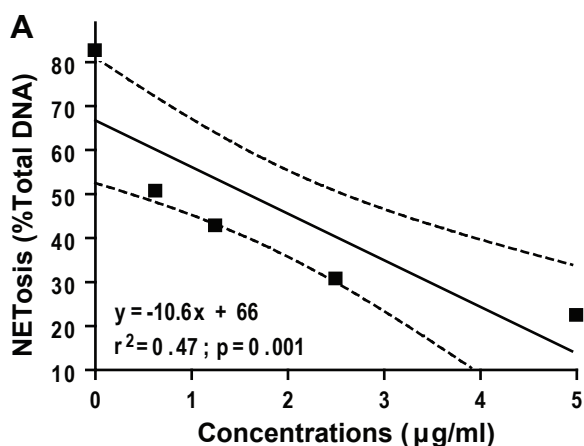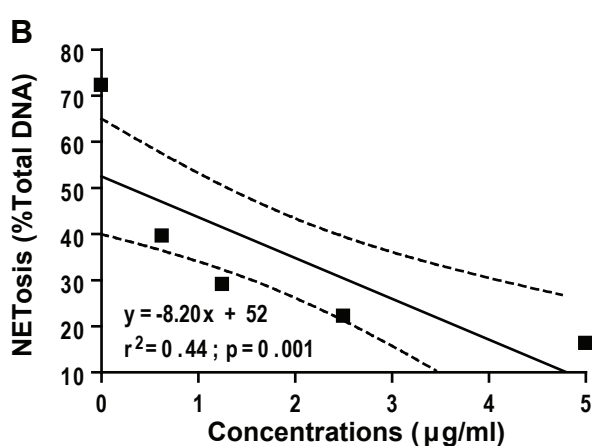

**Camptothecin 11 (Topoisomerase I inhibitor, suppresses DNA unwinding)**

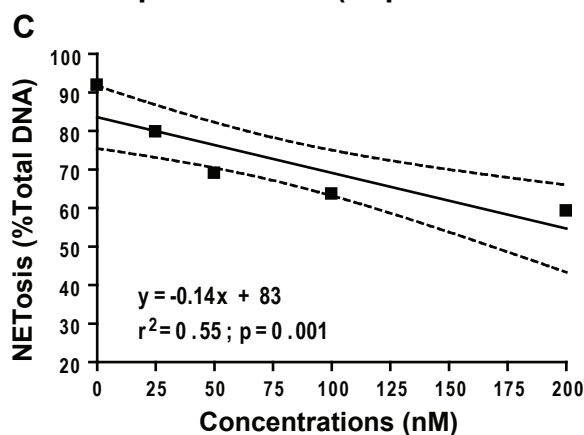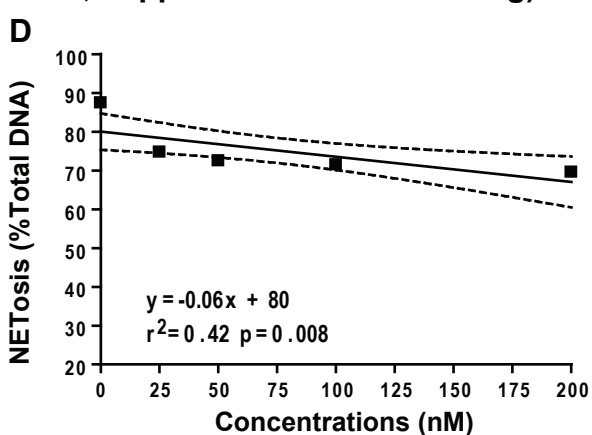

**DRB (CDK 7/9 inhibitor, suppresses mRNA elongation)**

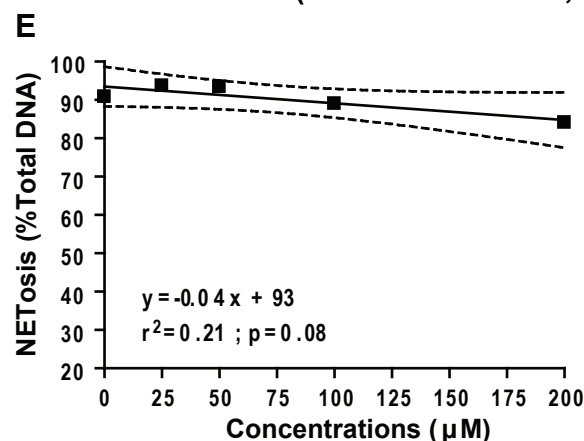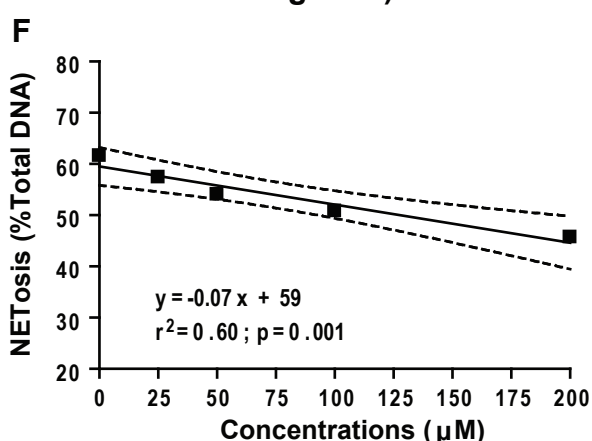

**Figure S5. Sytox green assays show that inhibition of initial steps of transcription suppresses both types of NETosis. (A)** Effect of G-C rich promoter melting inhibitor Actinomycin D (0, 0.625, 1.25, 2.5, 5.0  $\mu\text{g/ml}$ ) on PMA-mediated NETosis. **(B)** As of (A) but for A23187-mediated NETosis. **(C)** Effect of DNA topoisomerase 1 inhibitor Camptothecin 11 (0, 0.625, 1.25, 2.5, 5.0 nM) on PMA-mediated NETosis. **(D)** As of (C) but for A23187-mediated NETosis. **(E)** Effect of mRNA elongation inhibitor, that prevents the phosphorylation of CDK 7 and 9 to limit RNA polymerase movement on DNA (0, 25, 50, 100, 200  $\mu\text{M}$  DRB) on PMA-mediated NETosis. **(F)** As of (E) but for A23187-mediated NETosis.  $n=4$ ;  $p$ -value in each graph shows whether the slope is different than 0. Regression analysis conducted at the last time point as indicated in Figure 5.

**A**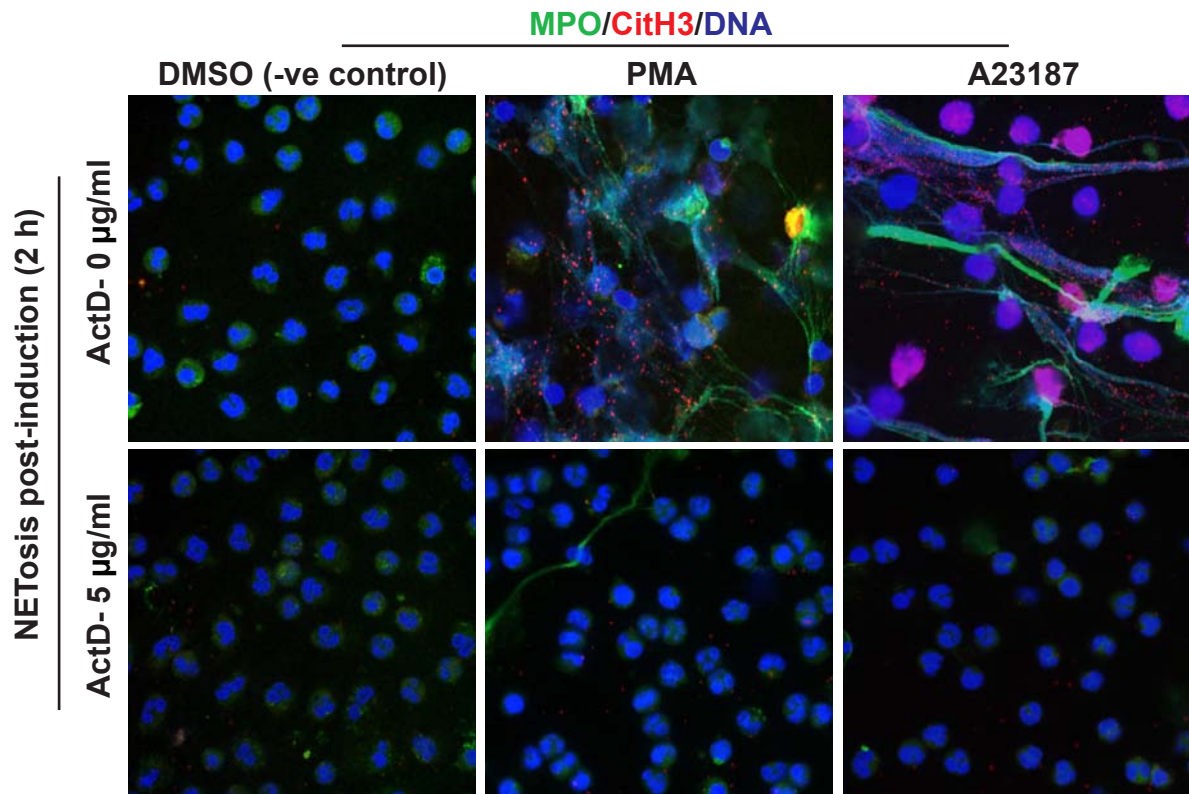**B**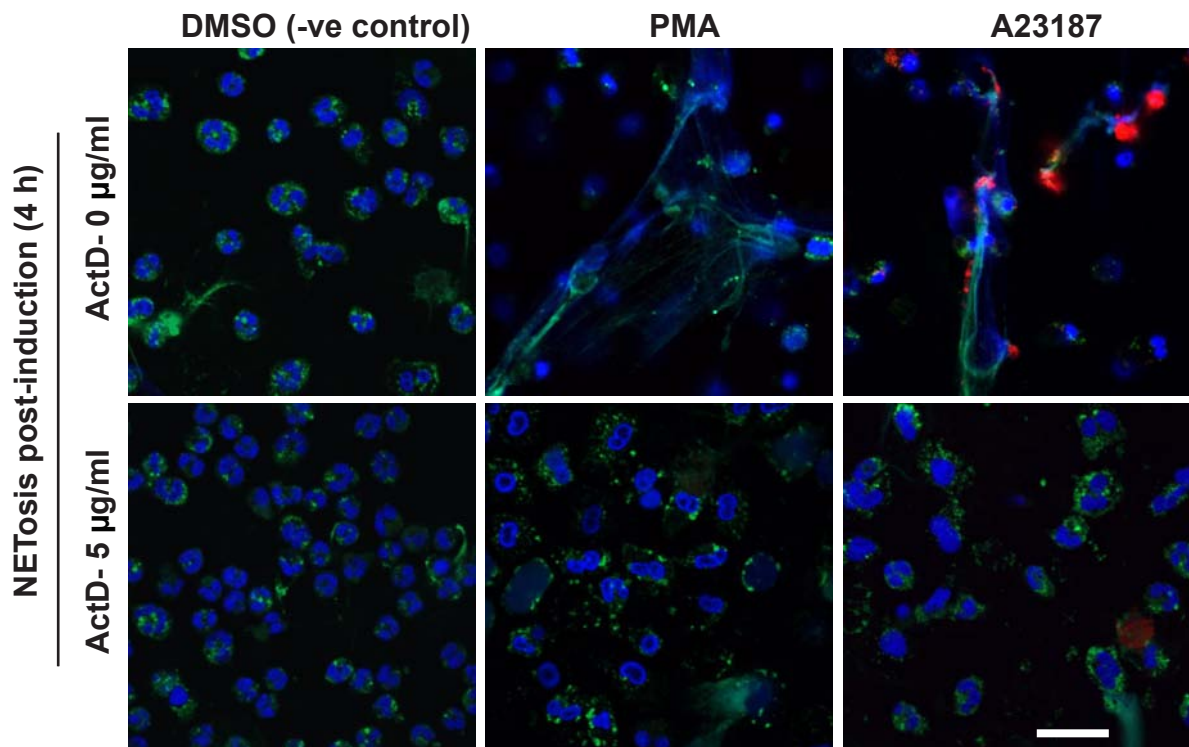

**Figure S6. Confocal microscopy images show that transcription inhibitor Actinomycin D suppresses NETosis.** Low magnification images. A portion of these images at 2 and 4 h are magnified to generate Figure 6. **(A)** Unstimulated control neutrophils show typical polymorphonuclear morphology. MPO is visible in the cytoplasm. MPO co-localizes to NET DNA generated by PMA-mediated NETosis. A limited amount of citrullinated histone 3 (CitH3) immunostaining is visible on some of the NETs. By contrast, intense immunostaining of CitH3 is visible on decondensed nuclei during A23187-induced NETosis and MPO colocalizes to NETs. **(B)** As of (A) but with ActD. PMA- and A23187-treated neutrophils did not show NETosis, and the nuclear morphology of these cells remains the same as that of the unstimulated control neutrophils. Only a limited amount of CitH3 is detectable in any of the ActD treated conditions. Blue, DAPI staining for DNA; Green, MPO; Red, CitH3. Scale bar, 25 µm.



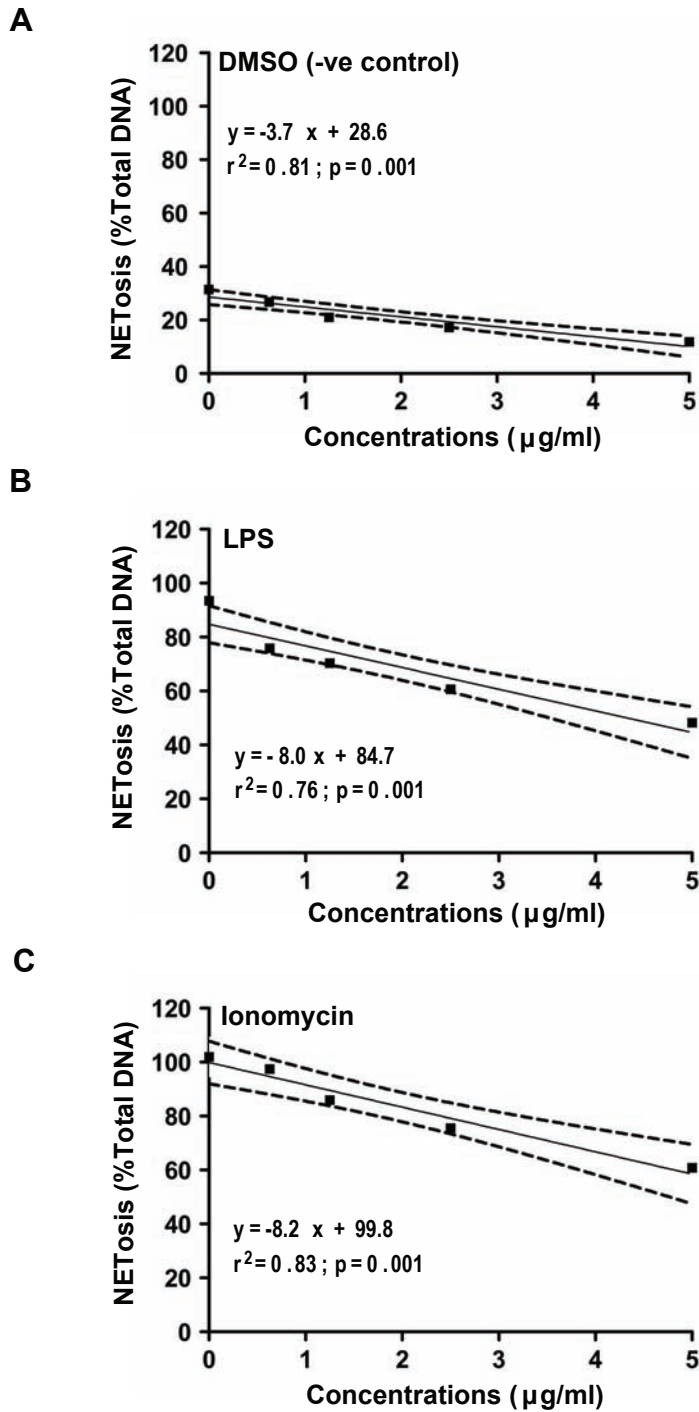

**Figure S7A. Sytox green assays show that Actinomycin D suppresses both LPS- and ionomycin-mediated NETosis.** Effect of G-C rich promoter melting inhibitor Actinomycin D (0, 0.625, 1.25, 2.5, 5.0  $\mu\text{g/ml}$ ) on (A) media only (DMSO, -ve control), (B) LPS- and (C) ionomycin-mediated NETosis.  $n=4$ ;  $p$ -value in each graph shows whether the slope is different than 0. Regression analysis conducted at the last time point as indicated in Figure 7.



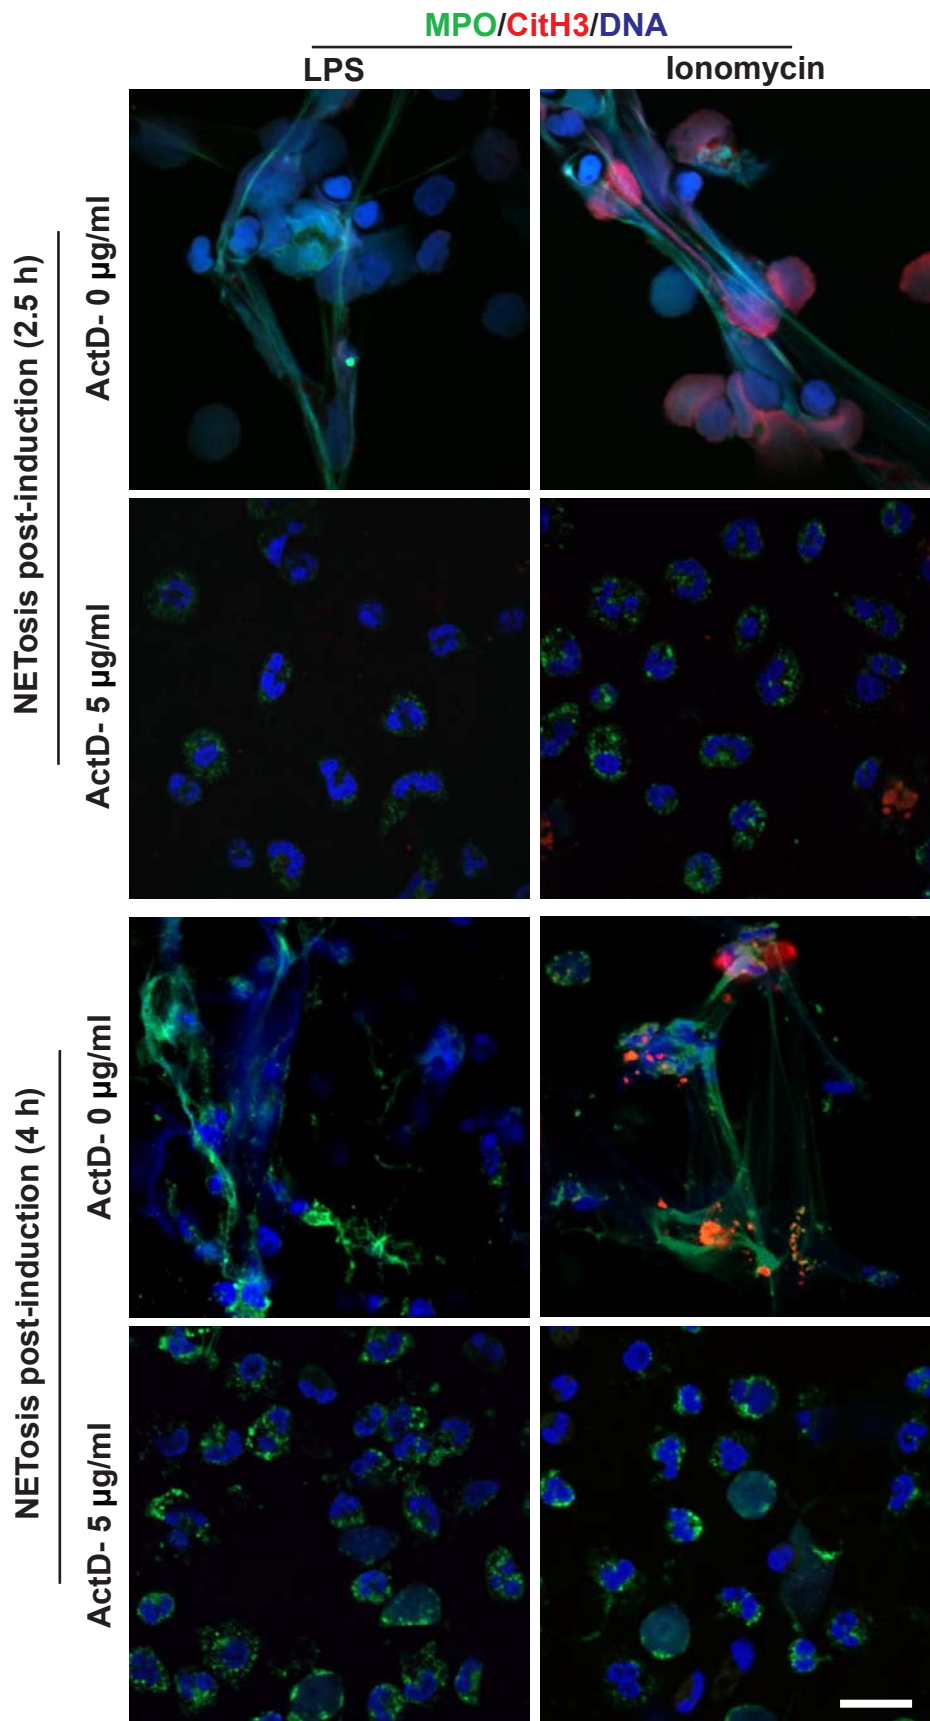

**Figure S7B. Actinomycin D suppresses biologically relevant agonists LPS-and ionomycin-induced NETosis.** Low magnification images. A portion of these images are magnified to generate Figure 7C. MPO co-localizes to NET DNA generated by LPS and ionomycin-mediated NETosis. The immunostaining of CitH3 is visible on decondensed nuclei during ionomycin-induced NETosis at both time points after the NETosis induction. Blue, DAPI staining for DNA; Green, MPO; Red, CitH3. Scale bar, 25 µm.

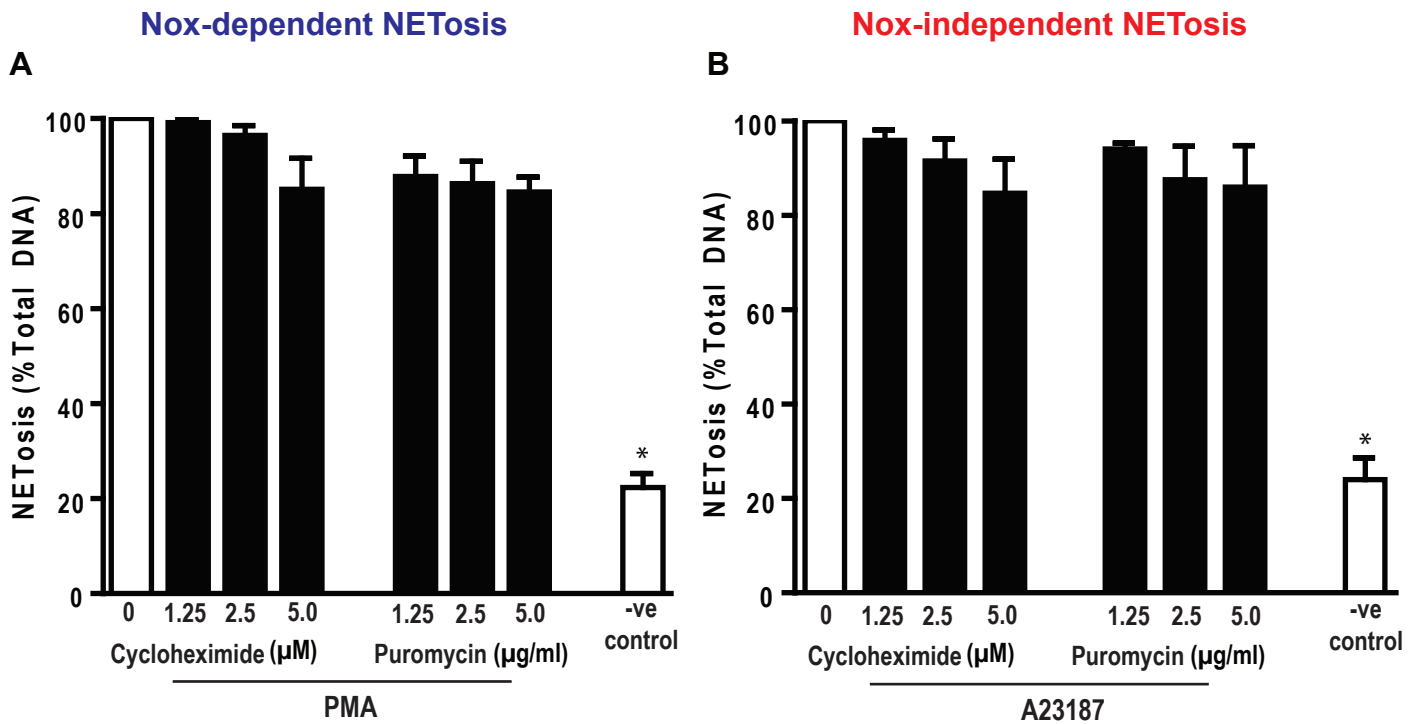

**Figure S8. Translation inhibitors do not suppress both PMA-mediated Nox-dependent and A23187-mediated Nox-independent NETosis.** (A) Neutrophils were preincubated with the indicated concentrations of translation inhibitor, cycloheximide or puromycin. PMA was then added to induce Nox-dependent NETosis. Degree of NETosis was monitored for 4 hours by monitoring the fluorescence intensity of Sytox green as a proxy. Sytox green dye present in the media is impermeable to living cells, and hence, when the DNA is released as NETs, Sytox green can bind and generate green fluorescence signal. (B) As of (A) except that A23187 was used, instead of PMA, for inducing Nox-independent NETosis. Percentage inhibition in each experiment was calculated, and the values were standardized to NETosis with agonists, but without any inhibitors as 100%. One sample t-test showed no significant difference between the inhibitor conditions and 100%. Only the unactivated neutrophil control is significantly different than NETotic conditions (\*,  $p < 0.05$ ). For (A)  $n=4$  and for (B)  $n=3$ .

Table S1: Primers of the target genes/transcript used in real-time PCR reactions

| <b>Gene symbol</b> | <b>Gene description</b>                                       | <b>Refseq</b>       | <b>Primer sequence<br/>(Forward and Reverse)</b>   |
|--------------------|---------------------------------------------------------------|---------------------|----------------------------------------------------|
| ANXA1              | AnnexinA1                                                     | NM_000700           | GCGAAACAATGCACAGCGTCAAC<br>CAACCTCCTCAAGGTGACCTGT  |
| C3AR1              | Complementcomponent3a<br>receptor1                            | NM_004054           | CCTGCTGATGTGGTCTCACCTA<br>CCTTGTGGTAGCTCAGACTCGT   |
| CYBB               | Cytochromeb-<br>245,betapolypeptide                           | NM_000397           | CTCTGAACTTGGAGACAGGCAA<br>CACAGCGTGATGACAACTCCAG   |
| EGR1               | Earlygrowthresponse1                                          | NM_001964           | AGCAGCACCTTCAACCCTCAGG<br>GAGTGGTTTGGCTGGGGTAACT   |
| GLA                | Galactosidase, alpha                                          | NM_000169           | GCAACCTTGACTGCCAGGAAGA<br>CTCATAACCTGCATCCTTCCAGC  |
| H3F3C              | H3histone, family3C                                           | NM_001013699        | TCCAGAGGTTGGTGAGGGAGAT<br>TAGCGTGGATGGCACACAGGTT   |
| IL18RAP            | Interleukin18receptoraces<br>soryprotein                      | NM_003853           | GCACAAAGTCCAGCGGTAACCT<br>GTCCACGAACTCACAGTATCCG   |
| JUNB               | junBproto-oncogene                                            | NM_002229           | CGATCTGCACAAGATGAACCACG<br>CTGCTGAGGTTGGTGTAACCG   |
| KLF2               | Kruppel-likefactor2(lung)                                     | NM_016270           | CCAAGAGTTCGCATCTGAAGGC<br>CCGTGTGCTTTCGGTAGTGCC    |
| MAP4K5             | Mitogen-activated protein<br>kinase kinase kinase<br>kinase 5 | NM_198794           | CCAACTGCTGAAAGACTTCTGAC<br>CTGCTTCAGTGTAATGTGCGTGG |
| IL1 $\beta$        | Interleukin 1 beta                                            | NM_000576           | CCACAGACCTTCCAGGAGAATG<br>GTGCAGTTCAGTGATCGTACAGG  |
| RP11-<br>1149M10.2 | Novel transcript                                              | ENSG00000253<br>214 | TCCAGCTTGACCATTGCTCACCT<br>ATGTGGATGGTGAGCTCAGACC  |
| SEMA7A             | Semaphorin 7A                                                 | NM_001146029        | CTTCTCCGAGAGGACAATCCTG<br>GTGTTCCACTTGGAGACTGACAG  |
| *GAPDH             | GAPDH                                                         | NM_001256799        | GTCTCCTCTGACTTCAACAGCG<br>ACCACCCTGTTGCTGTAGCCAA   |
| *ACTB              | Actin $\beta$                                                 | NM_001101           | CACCATGGCAATGAGCGGTTC<br>AGGTCTTTGCGGATGTCCACGT    |

\*housekeeping gene considered as control

Table S2: Differentially up-regulated transcripts in PMA induced NOX-dependent and A23187 induced NOX-independent NETosis.

| Transcript Cluster ID     | Gene Symbol    | p-value | Fold expression |        |        |        |
|---------------------------|----------------|---------|-----------------|--------|--------|--------|
|                           |                |         | PMA             |        | A23187 |        |
|                           |                |         | 30 min          | 60 min | 30 min | 60 min |
| TC17002322.hg.1           | AC004562.1     | 0.00    | 1.71            |        | 2.00   |        |
| TC17002062.hg.1           | AC022816.2     | 0.02    | 1.53            |        | 2.79   |        |
| TC08002347.hg.1           | AC069257.8     | 0.00    | 1.75            |        |        |        |
| TC10000813.hg.1           | ACSL5          | 0.00    |                 | 3.32   | 2.21   |        |
| TC03003258.hg.1           | ACTG1          | 0.04    | 2.48            |        |        |        |
| TC10000658.hg.1           | ACTG1          | 0.02    | 2.47            |        |        |        |
| TC21000785.hg.1           | ADARB1         | 0.03    |                 | 1.70   | 1.53   |        |
| TC11000182.hg.1           | ADM            | 0.04    |                 |        | 2.58   |        |
| TC22001457.hg.1           | ADORA2A        | 0.00    |                 |        | 1.56   |        |
| TC08000319.hg.1           | AGPAT6         | 0.01    |                 |        | 2.14   |        |
| TC01002479.hg.1           | AK2            | 0.03    |                 |        | 1.58   |        |
| TC01005394.hg.1           | AK2            | 0.02    |                 | 1.53   | 1.50   |        |
| TC08000937.hg.1           | ALG1L13P       | 0.02    |                 |        | 2.34   |        |
| TC13001557.hg.1           | ALG1L13P       | 0.05    | 1.91            |        |        |        |
| TC17001807.hg.1           | AMZ2P1         | 0.02    |                 |        |        | 1.76   |
| TC11002736.hg.1           | ANKRD13D       | 0.03    |                 |        | 2.19   |        |
| TC09000335.hg.1           | ANXA1          | 0.02    |                 | 2.52   | 2.02   |        |
| TC10002734.hg.1           | ANXA11         | 0.04    |                 | 1.94   |        |        |
| TC15002782.hg.1           | AP3S2          | 0.04    |                 |        | 2.13   |        |
| TC11001941.hg.1           | AP5B1          | 0.00    |                 |        |        | 1.54   |
| TC05003433.hg.1           | APBB3; MIR6831 | 0.01    |                 |        | 1.51   |        |
| TC15000595.hg.1           | ARL17A         | 0.05    | 2.35            |        |        |        |
| TC17_ctg5_hap1000002.hg.1 | ARL17A         | 0.05    |                 |        | 1.69   |        |
| TC02002891.hg.1           | ARL4C          | 0.03    |                 | 2.91   | 2.03   |        |
| TC02003640.hg.1           | ARL6IP6        | 0.03    |                 |        |        | 1.67   |
| TC17000802.hg.1           | ARSG           | 0.04    |                 |        | 2.02   |        |
| TC01001777.hg.1           | ATF3           | 0.00    |                 |        |        | 1.57   |
| TC12001216.hg.1           | ATF4           | 0.02    | 2.20            |        |        |        |
| TC11000399.hg.1           | ATG13          | 0.05    |                 |        | 1.96   |        |
| TC11003200.hg.1           | ATG2A          | 0.03    |                 |        | 1.61   |        |
| TC03000766.hg.1           | ATP1B3         | 0.01    |                 |        | 1.84   | 2.02   |
| TC01006365.hg.1           | BCAS2          | 0.04    |                 |        | 2.44   |        |
| TC11000544.hg.1           | BEST1          | 0.05    |                 |        | 1.57   |        |
| TC03000015.hg.1           | BHLHE40        | 0.03    |                 | 1.64   |        |        |
| TC08001043.hg.1           | BIN3-IT1       | 0.01    |                 |        |        | 1.99   |
| TC08002251.hg.1           | BIN3-IT1       | 0.01    |                 |        |        | 1.60   |
| TC02001696.hg.1           | BRE-AS1        | 0.03    |                 | 3.58   |        | 3.23   |
| TC02004133.hg.1           | BRE-AS1        | 0.04    |                 | 4.67   |        | 3.60   |
| TC11002794.hg.1           | BRE-AS1        | 0.03    | 4.32            |        |        |        |

| Transcript<br>Cluster ID | Gene Symbol             | p-value | Fold expression |        |        |        |
|--------------------------|-------------------------|---------|-----------------|--------|--------|--------|
|                          |                         |         | PMA             |        | A23187 |        |
|                          |                         |         | 30 min          | 60 min | 30 min | 60 min |
| TC22000750.hg.1          | BRE-AS1                 | 0.04    | 3.83            |        |        |        |
| TC07000584.hg.1          | BRI3                    | 0.04    |                 | 1.55   |        |        |
| TC01000567.hg.1          | BTBD19                  | 0.00    |                 |        |        | 1.71   |
| TC01001685.hg.1          | BTG2                    | 0.03    |                 |        | 2.44   |        |
| TC04000933.hg.1          | C11orf71                | 0.01    | 3.07            |        |        |        |
| TC11002312.hg.1          | C11orf71                | 0.01    |                 | 1.75   | 1.51   | 1.56   |
| TC15000691.hg.1          | C15orf39<br>C15orf48;   | 0.04    |                 |        | 2.07   |        |
| TC15000357.hg.1          | MIR147B                 | 0.01    |                 |        | 2.10   |        |
| TC12001171.hg.1          | C3AR1                   | 0.02    |                 |        | 6.55   |        |
| TC08001266.hg.1          | CA2                     | 0.02    | 2.85            |        |        |        |
| TC0X000070.hg.1          | CA5BP1                  | 0.01    |                 |        |        | 1.67   |
| TC19000496.hg.1          | CAPNS1                  | 0.03    |                 |        | 1.81   |        |
| TC11000327.hg.1          | CAT                     | 0.04    |                 | 1.70   | 1.70   |        |
| TC17000383.hg.1          | CCL2                    | 0.00    |                 |        | 7.27   | 4.55   |
| TC17001385.hg.1          | CCL3                    | 0.00    |                 |        | 7.21   | 4.95   |
| TC17001394.hg.1          | CCL3                    | 0.00    |                 |        | 6.25   | 4.15   |
| TC17002594.hg.1          | CCL3                    | 0.00    |                 |        | 5.53   | 4.48   |
| TC17001388.hg.1          | CCL3L3; CCL3L1          | 0.00    |                 |        | 6.57   | 4.27   |
| TC17001395.hg.1          | CCL3L3; CCL3L1<br>CCL4; | 0.00    |                 |        | 7.77   | 4.89   |
| TC17000408.hg.1          | LOC101060278            | 0.01    |                 |        | 4.36   | 1.94   |
| TC17000416.hg.1          | CCL4L1; CCL4L2          | 0.00    |                 |        | 4.21   | 2.54   |
| TC17000423.hg.1          | CCL4L1; CCL4L2          | 0.00    |                 |        | 4.37   | 2.82   |
| TC17001378.hg.1          | CCL5                    | 0.01    |                 |        |        | 1.84   |
| TC03000257.hg.1          | CCRL2                   | 0.03    |                 |        | 2.51   |        |
| TC05001861.hg.1          | CD14                    | 0.02    |                 |        | 2.32   |        |
| TC01005001.hg.1          | CD24                    | 0.04    | 1.59            |        |        |        |
| TC0Y000182.hg.1          | CD24                    | 0.03    |                 |        |        | 1.84   |
| TC19000729.hg.1          | CD37                    | 0.04    |                 |        | 1.62   |        |
| TC0X000666.hg.1          | CD40LG                  | 0.02    |                 |        | 1.59   |        |
| TC01005732.hg.1          | CD58                    | 0.05    |                 |        | 4.23   |        |
| TC09001085.hg.1          | CD69                    | 0.04    | 6.03            |        |        |        |
| TC12001207.hg.1          | CD69                    | 0.04    |                 | 3.23   | 2.24   | 9.65   |
| TC12002752.hg.1          | CD69                    | 0.03    |                 | 3.48   | 2.22   | 8.80   |
| TC22001130.hg.1          | CD69                    | 0.04    | 5.87            |        |        |        |
| TC06000099.hg.1          | CD83                    | 0.00    |                 |        |        | 2.15   |
| TC01000281.hg.1          | CDC42-IT1               | 0.02    |                 |        | 1.62   |        |
| TC19002491.hg.1          | CEACAM1                 | 0.03    |                 | 1.82   |        |        |
| TC18000059.hg.1          | CHMP1B                  | 0.01    |                 |        |        | 2.22   |
| TC14001732.hg.1          | CHURC1                  | 0.04    |                 |        | 2.48   |        |
| TC03001156.hg.1          | CIDECP                  | 0.03    |                 |        | 1.97   |        |
| TC09000415.hg.1          | CKS2                    | 0.01    |                 | 1.77   |        | 1.80   |

| Transcript<br>Cluster ID | Gene Symbol             | p-value | Fold expression |        |        |        |
|--------------------------|-------------------------|---------|-----------------|--------|--------|--------|
|                          |                         |         | PMA             |        | A23187 |        |
|                          |                         |         | 30 min          | 60 min | 30 min | 60 min |
| TC09002074.hg.1          | CKS2                    | 0.02    |                 | 2.45   |        | 2.42   |
| TC02004719.hg.1          | COMMD5                  | 0.04    | 2.75            |        |        |        |
| TC08002624.hg.1          | COMMD5;<br>LOC101928879 | 0.01    |                 |        | 1.53   |        |
| TC04001346.hg.1          | COQ2                    | 0.05    |                 |        | 2.85   |        |
| TC03001095.hg.1          | COX17                   | 0.04    | 1.91            |        |        |        |
| TC10000238.hg.1          | CREM                    | 0.02    |                 |        | 2.35   |        |
| TC01000955.hg.1          | CSF1                    | 0.00    |                 |        |        | 2.53   |
| TC03001302.hg.1          | CSRNP1                  | 0.02    |                 |        |        | 2.34   |
| TC20000428.hg.1          | CSTF1                   | 0.01    |                 |        | 1.95   |        |
| TC0X001836.hg.1          | CTB-11I22.2             | 0.03    | 1.61            |        |        |        |
| TC04000411.hg.1          | CXCL1                   | 0.04    |                 | 3.49   |        |        |
| TC17001029.hg.1          | CXCL16                  | 0.04    |                 |        | 3.56   |        |
| TC04001286.hg.1          | CXCL2                   | 0.02    |                 |        |        | 2.05   |
| TC0X000711.hg.1          | CXorf40A                | 0.01    |                 |        | 1.53   |        |
| TC0X001909.hg.1          | CXorf40A                | 0.04    |                 |        | 1.61   | 1.56   |
| TC12000527.hg.1          | CYB5D1                  | 0.00    | 3.34            |        |        |        |
| TC17000119.hg.1          | CYB5D1                  | 0.02    |                 | 2.81   |        | 1.64   |
| TC0X000171.hg.1          | CYBB                    | 0.02    |                 |        | 3.33   |        |
| TC02001311.hg.1          | CYP27A1                 | 0.01    |                 |        | 1.52   |        |
| TC22000666.hg.1          | DDIT3                   | 0.03    | 6.67            |        |        |        |
| TC0Y000053.hg.1          | DDX3Y                   | 0.04    |                 |        |        | 2.32   |
| TC17001058.hg.1          | DERL2                   | 0.03    |                 |        | 1.64   |        |
| TC22000829.hg.1          | DESI1                   | 0.03    |                 |        | 1.53   |        |
| TC08001044.hg.1          | DKFZp434E1119           | 0.00    | 6.28            |        |        |        |
| TC11002794.hg.1          | DKFZp434E1119           | 0.00    |                 | 3.97   | 2.56   | 4.19   |
| TC11000647.hg.1          | DRAP1                   | 0.02    |                 |        |        | 1.64   |
| TC05002066.hg.1          | DUSP1                   | 0.01    |                 |        | 2.72   | 3.14   |
| TC01003847.hg.1          | DUSP10                  | 0.03    |                 |        |        | 1.50   |
| TC02002102.hg.1          | DUSP2                   | 0.01    |                 |        |        | 1.51   |
| TC14000471.hg.1          | DUSP2                   | 0.04    | 1.82            |        |        |        |
| TC0X000952.hg.1          | DYNLT3                  | 0.03    |                 |        | 1.59   |        |
| TC01002322.hg.1          | ECE1                    | 0.04    |                 |        | 2.81   |        |
| TC01005311.hg.1          | ECE1                    | 0.03    |                 |        | 2.76   |        |
| TC04002396.hg.1          | EGR1                    | 0.00    | 23.79           |        |        |        |
| TC05000701.hg.1          | EGR1                    | 0.01    |                 | 6.59   | 5.05   | 2.78   |
| TC10001327.hg.1          | EGR2                    | 0.00    |                 |        | 2.58   | 2.03   |
| TC22000648.hg.1          | EGR2                    | 0.04    | 1.69            |        |        |        |
| TC08001044.hg.1          | EGR3                    | 0.00    |                 |        | 4.29   | 3.19   |
| TC08002253.hg.1          | EGR3                    | 0.00    |                 | 3.80   | 8.58   | 6.78   |
| TC19002413.hg.1          | EGR3                    | 0.01    | 4.30            |        |        |        |
| TC20000283.hg.1          | EGR3                    | 0.00    | 2.09            |        |        |        |

| Transcript<br>Cluster ID | Gene Symbol         | p-value | Fold expression |        |        |        |
|--------------------------|---------------------|---------|-----------------|--------|--------|--------|
|                          |                     |         | PMA             |        | A23187 |        |
|                          |                     |         | 30 min          | 60 min | 30 min | 60 min |
| TC11001915.hg.1          | EHD1                | 0.04    |                 |        | 2.00   |        |
| TC17000119.hg.1          | EIF1                | 0.04    | 3.21            |        |        |        |
| TC17001933.hg.1          | EIF4A3              | 0.04    |                 |        | 2.28   |        |
| TC0X000768.hg.1          | EMD                 | 0.01    |                 |        | 1.52   |        |
| TC12000189.hg.1          | EMP1                | 0.01    |                 |        |        | 2.03   |
| TC04000414.hg.1          | EREG                | 0.02    |                 |        |        | 2.61   |
| TC17000965.hg.1          | FAM101B             | 0.03    |                 |        | 3.26   |        |
| TC06003239.hg.1          | FAM120B             | 0.04    |                 |        | 1.50   |        |
| TC0X000777.hg.1          | FAM223A;<br>FAM223B | 0.01    |                 |        | 1.50   |        |
| TC0X001540.hg.1          | FAM223A;<br>FAM223B | 0.04    |                 |        | 1.57   |        |
| TC05000698.hg.1          | FAM53C              | 0.04    |                 |        | 1.65   |        |
| TC10000523.hg.1          | FAM85A              | 0.04    | 1.70            |        |        |        |
| TC19000885.hg.1          | FCAR                | 0.02    |                 |        | 3.29   |        |
| TC19002237.hg.1          | FCAR                | 0.02    |                 |        | 3.44   |        |
| TC19000470.hg.1          | FFAR2               | 0.03    |                 |        |        | 2.67   |
| TC19000467.hg.1          | FFAR3               | 0.00    |                 |        |        | 1.72   |
| TC01002530.hg.1          | FHL3                | 0.04    |                 |        | 1.51   | 1.52   |
| TC13000354.hg.1          | FKSG29              | 0.03    |                 |        |        | 2.12   |
| TC13001253.hg.1          | FKSG29              | 0.01    |                 |        |        | 2.00   |
| TC12002387.hg.1          | FKSG49              | 0.02    | 1.64            |        |        |        |
| TC15001352.hg.1          | FLJ10038            | 0.02    |                 |        |        | 1.92   |
| TC15002531.hg.1          | FLJ10038            | 0.03    |                 |        |        | 1.82   |
| TC02000950.hg.1          | FLJ46875            | 0.03    | 2.00            |        |        |        |
| TC02002446.hg.1          | FLJ46875            | 0.00    |                 |        | 4.40   | 2.86   |
| TC02004656.hg.1          | FLJ46875            | 0.01    |                 |        | 2.67   | 1.93   |
| TC02004656.hg.1          | FLJ46875            | 0.00    |                 |        |        |        |
| TC12002088.hg.1          | FLJ46875            | 0.03    | 2.48            |        |        |        |
| TC0X001530.hg.1          | FLNA                | 0.02    |                 | 1.82   | 2.17   |        |
| TC14000471.hg.1          | FOS                 | 0.00    |                 | 4.00   | 6.28   | 5.70   |
| TC16001990.hg.1          | FOS                 | 0.00    | 5.55            |        |        |        |
| TC12000953.hg.1          | FOSB                | 0.02    | 2.84            |        |        |        |
| TC12002399.hg.1          | FOSB                | 0.02    | 3.25            |        |        |        |
| TC19000647.hg.1          | FOSB                | 0.00    |                 | 3.34   | 4.69   | 9.26   |
| TC19002172.hg.1          | FOSB                | 0.00    |                 | 3.14   | 3.64   | 7.93   |
| TC02000183.hg.1          | FOSL2               | 0.03    |                 | 2.63   | 2.05   |        |
| TC19001787.hg.1          | FPR1                | 0.03    |                 |        | 1.92   |        |
| TC19002215.hg.1          | FPR1                | 0.04    |                 |        | 1.97   |        |
| TC11001860.hg.1          | FTH1                | 0.03    |                 |        | 1.50   |        |
| TC11003179.hg.1          | FTH1                | 0.01    |                 |        | 1.67   |        |
| TC02004131.hg.1          | FTH1P3              | 0.01    |                 | 1.53   | 1.51   |        |
| TC0X001156.hg.1          | FTX                 | 0.03    |                 |        | 1.71   |        |



| Transcript<br>Cluster ID | Gene Symbol | p-value | Fold expression |        |        |        |
|--------------------------|-------------|---------|-----------------|--------|--------|--------|
|                          |             |         | PMA             |        | A23187 |        |
|                          |             |         | 30 min          | 60 min | 30 min | 60 min |
| TC03000349.hg.1          | G0S2        | 0.04    | 2.90            |        |        |        |
| TC08001246.hg.1          | G0S2        | 0.04    | 2.85            |        |        |        |
| TC17000915.hg.1          | GAA         | 0.02    |                 |        |        | 1.51   |
| TC07000198.hg.1          | GARS        | 0.05    |                 | 3.89   |        |        |
| TC14001152.hg.1          | GCH1        | 0.04    |                 |        | 2.36   |        |
| TC14002019.hg.1          | GCH1        | 0.03    |                 |        | 2.63   |        |
| TC03003122.hg.1          | GK5         | 0.01    |                 | 1.52   |        |        |
| TC0X000142.hg.1          | GK-IT1      | 0.04    |                 |        | 1.72   |        |
| TC0X001219.hg.1          | GLA         | 0.04    |                 |        | 2.52   |        |
| TC14001791.hg.1          | GLA         | 0.04    | 4.44            |        |        |        |
| TC17001031.hg.1          | GLTPD2      | 0.01    |                 |        | 2.33   |        |
| TC05001879.hg.1          | GNPDA1      | 0.04    |                 | 1.52   |        |        |
| TC19000442.hg.1          | GPI         | 0.04    |                 |        |        | 1.57   |
| TC01000809.hg.1          | GPR174      | 0.04    | 1.72            |        |        |        |
| TC13000828.hg.1          | GPR18       | 0.04    |                 | 1.87   |        |        |
| TC13000829.hg.1          | GPR183      | 0.04    |                 |        |        | 2.71   |
| TC03001407.hg.1          | GPX1        | 0.00    |                 |        |        | 1.84   |
| TC17000570.hg.1          | GRN         | 0.03    |                 |        | 1.87   |        |
| TC22000304.hg.1          | GTPBP1      | 0.02    |                 |        | 1.68   |        |
| TC12001368.hg.1          | H3F3C       | 0.01    |                 |        | 1.85   |        |
| TC01001269.hg.1          | HAX1        | 0.01    |                 |        | 2.16   | 1.56   |
| TC16000008.hg.1          | HBA1; HBA2  | 0.03    |                 |        | 1.59   |        |
| TC05001854.hg.1          | HBEGF       | 0.00    |                 |        |        | 2.05   |
| TC12000141.hg.1          | HCAR2       | 0.04    | 4.66            |        |        |        |
| TC12002078.hg.1          | HCAR2       | 0.01    |                 | 5.06   |        | 4.92   |
| TC06000299.hg.1          | HCG14       | 0.04    |                 |        | 1.73   |        |
| TC6_apd_hap1000001.hg.1  | HCG14       | 0.04    |                 |        | 1.73   |        |
| TC6_cox_hap2000003.hg.1  | HCG14       | 0.03    |                 |        | 1.80   |        |
| TC6_mcf_hap5000001.hg.1  | HCG14       | 0.03    |                 |        | 1.80   |        |
| TC6_qbl_hap6000001.hg.1  | HCG14       | 0.04    |                 |        | 1.73   |        |
| TC6_ssto_hap7000001.hg.1 | HCG14       | 0.03    |                 |        | 1.80   |        |
| TC05002152.hg.1          | HEIH        | 0.04    |                 | 1.78   |        |        |
| TC03001071.hg.1          | HES1        | 0.03    |                 | 2.30   |        |        |
| TC03002732.hg.1          | HES1        | 0.02    |                 | 2.94   | 1.67   |        |
| TC17000231.hg.1          | HES1        | 0.02    | 2.51            |        |        |        |
| TC17001237.hg.1          | HES1        | 0.02    | 3.76            |        |        |        |
| TC08002304.hg.1          | HEXA-AS1    | 0.03    | 2.05            |        |        |        |
| TC11000750.hg.1          | HEXA-AS1    | 0.03    | 1.93            |        |        |        |
| TC15000657.hg.1          | HEXA-AS1    | 0.02    |                 | 2.03   |        |        |

| Transcript<br>Cluster ID | Gene Symbol                                                                                                                                                                                                                               | p-value | Fold expression |        |        |        |
|--------------------------|-------------------------------------------------------------------------------------------------------------------------------------------------------------------------------------------------------------------------------------------|---------|-----------------|--------|--------|--------|
|                          |                                                                                                                                                                                                                                           |         | PMA             |        | A23187 |        |
|                          |                                                                                                                                                                                                                                           |         | 30 min          | 60 min | 30 min | 60 min |
| TC15002266.hg.1          | HEXA-AS1                                                                                                                                                                                                                                  | 0.02    |                 | 2.21   |        |        |
| TC17000019.hg.1          | HIC1                                                                                                                                                                                                                                      | 0.04    |                 | 1.51   |        |        |
| TC07001534.hg.1          | HIP1                                                                                                                                                                                                                                      | 0.04    |                 |        |        | 1.50   |
| TC06000171.hg.1          | HIST1H2BF;<br>HIST1H2BG;<br>HIST1H2BE;<br>HIST1H2BI;<br>HIST1H2BC<br>HIST1H4C;<br>HIST1H4I;<br>HIST1H4A;<br>HIST1H4D;<br>HIST1H4F;<br>HIST1H4K;<br>HIST1H4J;<br>HIST1H4H;<br>HIST1H4B;<br>HIST1H4E;<br>HIST1H4L;<br>HIST2H4A;<br>HIST4H4; | 0.02    |                 |        | 1.60   |        |
| TC06000166.hg.1          | HIST2H4B<br>HIST1H4K;<br>HIST1H4I;<br>HIST1H4A;<br>HIST1H4D;<br>HIST1H4F;<br>HIST1H4J;<br>HIST1H4C;<br>HIST1H4H;<br>HIST1H4B;<br>HIST1H4E;<br>HIST1H4L;<br>HIST2H4A;<br>HIST4H4;                                                          | 0.01    |                 |        |        | 1.60   |
| TC06001424.hg.1          | HIST2H4B<br>HIST2H2AA4;                                                                                                                                                                                                                   | 0.03    |                 |        | 1.54   |        |
| TC01001174.hg.1          | HIST2H2AA3<br>HIST2H2AA4;                                                                                                                                                                                                                 | 0.02    |                 |        | 6.20   |        |
| TC01003190.hg.1          | HIST2H2AA3                                                                                                                                                                                                                                | 0.01    |                 |        | 2.97   | 1.71   |
| TC01006326.hg.1          | HIST2H2AC                                                                                                                                                                                                                                 | 0.04    |                 |        | 2.19   | 1.59   |
| TC01001046.hg.1          | HIST2H2BA                                                                                                                                                                                                                                 | 0.02    |                 |        | 1.71   |        |
| TC01003191.hg.1          | HIST2H2BC                                                                                                                                                                                                                                 | 0.01    |                 |        | 2.24   |        |
| TC01003193.hg.1          | HIST2H2BE<br>HIST2H2BF;                                                                                                                                                                                                                   | 0.01    |                 |        | 3.63   | 1.57   |
| TC01003172.hg.1          | HIST2H3PS2<br>HIST2H2BF; RP11-<br>196G18.3; RP11-                                                                                                                                                                                         | 0.00    |                 |        | 3.25   |        |
| TC01003187.hg.1          | 196G18.21<br>HIST2H4B;<br>HIST2H4A;<br>HIST1H4I;                                                                                                                                                                                          | 0.00    |                 |        | 1.92   |        |
| TC01001173.hg.1          | HIST1H4A;                                                                                                                                                                                                                                 | 0.04    |                 |        | 1.95   |        |

| Transcript<br>Cluster ID | Gene Symbol                                                                                                                                                                                                                                                                                           | p-value | Fold expression |        |        |        |
|--------------------------|-------------------------------------------------------------------------------------------------------------------------------------------------------------------------------------------------------------------------------------------------------------------------------------------------------|---------|-----------------|--------|--------|--------|
|                          |                                                                                                                                                                                                                                                                                                       |         | PMA             |        | A23187 |        |
|                          |                                                                                                                                                                                                                                                                                                       |         | 30 min          | 60 min | 30 min | 60 min |
|                          | HIST1H4D;<br>HIST1H4F;<br>HIST1H4K;<br>HIST1H4J;<br>HIST1H4C;<br>HIST1H4H;<br>HIST1H4B;<br>HIST1H4E;<br>HIST1H4L;<br>HIST4H4<br>HIST2H4B;<br>HIST2H4A;<br>HIST1H4I;<br>HIST1H4A;<br>HIST1H4D;<br>HIST1H4F;<br>HIST1H4K;<br>HIST1H4J;<br>HIST1H4C;<br>HIST1H4H;<br>HIST1H4B;<br>HIST1H4E;<br>HIST1H4L; |         |                 |        |        |        |
| TC01003192.hg.1          | HIST4H4                                                                                                                                                                                                                                                                                               | 0.04    |                 |        | 1.94   |        |
| TC06002084.hg.1          | HNRNPA3P3                                                                                                                                                                                                                                                                                             | 0.04    | 1.55            |        |        |        |
| TC17000165.hg.1          | HS3ST3B1                                                                                                                                                                                                                                                                                              | 0.01    |                 |        | 1.79   |        |
| TC17001232.hg.1          | HS3ST3B1                                                                                                                                                                                                                                                                                              | 0.01    | 1.54            |        |        |        |
| TC09001589.hg.1          | HSPA5                                                                                                                                                                                                                                                                                                 | 0.04    |                 |        | 2.87   |        |
| TC01005882.hg.1          | HSPC081                                                                                                                                                                                                                                                                                               | 0.03    |                 |        |        | 1.67   |
| TC19000175.hg.1          | ICAM4                                                                                                                                                                                                                                                                                                 | 0.01    |                 |        |        | 2.12   |
| TC19000237.hg.1          | IER2                                                                                                                                                                                                                                                                                                  | 0.00    |                 |        |        | 1.55   |
| TC06001510.hg.1          | IER3                                                                                                                                                                                                                                                                                                  | 0.02    |                 | 2.47   |        |        |
| TC6_cox_hap2000143.hg.1  | IER3                                                                                                                                                                                                                                                                                                  | 0.04    |                 | 2.42   |        |        |
| TC6_dbb_hap3000132.hg.1  | IER3                                                                                                                                                                                                                                                                                                  | 0.04    |                 | 2.42   |        |        |
| TC6_mann_hap4000121.hg.1 | IER3                                                                                                                                                                                                                                                                                                  | 0.04    |                 | 2.42   |        |        |
| TC6_qbl_hap6000133.hg.1  | IER3                                                                                                                                                                                                                                                                                                  | 0.04    |                 | 2.31   |        |        |
| TC6_ssto_hap7000123.hg.1 | IER3                                                                                                                                                                                                                                                                                                  | 0.04    |                 | 2.42   |        |        |
| TC01001569.hg.1          | IER5                                                                                                                                                                                                                                                                                                  | 0.01    |                 |        |        | 1.50   |
| TC11002312.hg.1          | IFI30                                                                                                                                                                                                                                                                                                 | 0.04    | 2.39            |        |        |        |
| TC19002629.hg.1          | IFI30                                                                                                                                                                                                                                                                                                 | 0.04    |                 | 1.83   |        |        |
| TC10000637.hg.1          | IFIT3                                                                                                                                                                                                                                                                                                 | 0.02    |                 | 2.05   |        |        |
| TC12001696.hg.1          | IFNG                                                                                                                                                                                                                                                                                                  | 0.01    |                 |        |        | 1.62   |
| TC12002948.hg.1          | IFNG                                                                                                                                                                                                                                                                                                  | 0.04    |                 |        | 1.51   | 1.80   |
| TC21000408.hg.1          | IL10RB-AS1                                                                                                                                                                                                                                                                                            | 0.02    |                 |        |        | 1.57   |
| TC21000932.hg.1          | IL10RB-AS1                                                                                                                                                                                                                                                                                            | 0.02    |                 |        |        | 1.64   |

| Transcript<br>Cluster ID | Gene Symbol   | p-value | Fold expression |        |        |        |
|--------------------------|---------------|---------|-----------------|--------|--------|--------|
|                          |               |         | PMA             |        | A23187 |        |
|                          |               |         | 30 min          | 60 min | 30 min | 60 min |
| TC11002771.hg.1          | IL18BP        | 0.03    |                 |        |        | 1.66   |
| TC02000623.hg.1          | IL18RAP       | 0.05    |                 |        | 3.92   |        |
| TC02002218.hg.1          | IL1A          | 0.02    |                 |        |        | 2.17   |
| TC02002219.hg.1          | IL1B          | 0.01    |                 |        | 1.59   | 1.73   |
| TC03001048.hg.1          | IL1RAP        | 0.05    |                 |        | 6.72   | 2.89   |
| TC02004994.hg.1          | IL1RL1        | 0.05    |                 |        |        | 2.08   |
| TC02000720.hg.1          | IL1RN         | 0.01    |                 |        |        | 1.88   |
| TC0X000008.hg.1          | IL3RA         | 0.04    |                 | 2.25   |        |        |
| TC03001122.hg.1          | IL5RA         | 0.03    |                 |        |        | 2.25   |
| TC07001318.hg.1          | INHBA         | 0.01    |                 |        |        | 1.74   |
| TC11001241.hg.1          | IRF7          | 0.04    |                 |        |        | 1.64   |
| TC01003351.hg.1          | ISG20L2       | 0.02    |                 |        | 2.70   | 1.77   |
| TC01003901.hg.1          | ITPKB         | 0.01    |                 |        |        | 1.52   |
| TC01006164.hg.1          | ITPKB         | 0.02    |                 |        | 3.33   | 3.41   |
| TC01001864.hg.1          | ITPKB-AS1     | 0.02    |                 |        | 2.01   | 1.60   |
| TC06001288.hg.1          | JARID2-AS1    | 0.01    |                 |        | 2.39   | 1.65   |
| TC06003492.hg.1          | JARID2-AS1    | 0.01    |                 |        | 2.08   | 1.77   |
| TC22000796.hg.1          | JOSD1         | 0.03    |                 | 2.32   | 1.65   |        |
| TC01002708.hg.1          | JUN           | 0.00    |                 |        |        | 1.98   |
| TC19001995.hg.1          | JUNB          | 0.04    |                 |        |        | 2.27   |
| TC19001285.hg.1          | JUND          | 0.04    |                 |        | 2.85   | 2.74   |
| TC08002345.hg.1          | KATNBL1       | 0.01    | 6.47            |        |        |        |
| TC15001191.hg.1          | KATNBL1       | 0.01    |                 | 4.55   |        |        |
| TC08000640.hg.1          | KB-1507C5.4   | 0.03    |                 |        |        | 2.49   |
| TC17000165.hg.1          | KB-1507C5.4   | 0.02    | 2.28            |        |        |        |
| TC03000407.hg.1          | KBTBD8        | 0.02    |                 |        |        | 1.68   |
| TC19000321.hg.1          | KLF2          | 0.00    |                 |        | 3.10   | 4.08   |
| TC09001447.hg.1          | KLF4          | 0.00    |                 |        |        | 1.50   |
| TC17000311.hg.1          | KSR1          | 0.04    |                 |        |        | 1.51   |
| TC22000647.hg.1          | LIF           | 0.00    |                 |        |        | 2.04   |
| TC19002719.hg.1          | LILRA5        | 0.02    |                 |        | 1.69   |        |
| TC02000667.hg.1          | LIMS1; LIMS3L | 0.01    |                 | 1.98   |        |        |
| TC02004997.hg.1          | LIMS3L; LIMS3 | 0.00    |                 | 1.56   |        |        |
| TC17001233.hg.1          | LINC00664     | 0.01    | 4.00            |        |        |        |
| TC19000392.hg.1          | LINC00664     | 0.00    |                 | 2.63   | 2.13   | 2.04   |
| TC19002042.hg.1          | LINC00664     | 0.00    | 3.22            | 3.33   | 2.67   | 2.68   |
| TC05001066.hg.1          | LINC00847     | 0.00    |                 | 1.51   |        |        |
| TC07002289.hg.1          | LINC00847     | 0.04    | 2.53            |        |        |        |
| TC17000118.hg.1          | LINC00847     | 0.04    | 2.20            |        |        |        |
| TC03001551.hg.1          | LINC00877     | 0.05    |                 |        | 1.91   |        |
| TC03002966.hg.1          | LINC00877     | 0.05    |                 |        | 2.08   |        |
| TC03001074.hg.1          | LINC00884     | 0.04    |                 | 1.84   |        |        |

| Transcript<br>Cluster ID | Gene Symbol                    | p-value | Fold expression |        |        |        |
|--------------------------|--------------------------------|---------|-----------------|--------|--------|--------|
|                          |                                |         | PMA             |        | A23187 |        |
|                          |                                |         | 30 min          | 60 min | 30 min | 60 min |
| TC03002737.hg.1          | LINC00884                      | 0.01    |                 | 1.94   | 1.51   |        |
| TC03002738.hg.1          | LINC00884                      | 0.02    |                 | 1.92   |        |        |
| TC19001354.hg.1          | LINC00884                      | 0.03    | 1.64            |        |        |        |
| TC16001394.hg.1          | LINC00921                      | 0.04    |                 |        | 2.34   |        |
| TC0X002289.hg.1          | LINC00936                      | 0.05    | 3.13            |        |        |        |
| TC12000698.hg.1          | LINC00936                      | 0.00    |                 | 5.32   | 3.93   | 4.06   |
| TC01006046.hg.1          | LINC01136                      | 0.02    |                 | 1.91   |        | 1.66   |
| TC01006046.hg.1          | LINC01136                      | 0.01    |                 |        |        |        |
| TC08000517.hg.1          | LINC01136                      | 0.03    | 1.68            |        |        |        |
| TC01003720.hg.1          | LINC01136; RP11-134P9.1        | 0.01    |                 | 2.23   | 1.85   | 1.77   |
| TC14000472.hg.1          | LINC01220                      | 0.00    |                 | 2.04   | 2.64   | 2.48   |
| TC14001775.hg.1          | LINC01220                      | 0.00    |                 | 1.94   | 2.46   | 2.61   |
| TC08001414.hg.1          | LINC01262                      | 0.00    | 4.74            |        |        |        |
| TC04000933.hg.1          | LINC01262; RP11-462G22.1       | 0.02    |                 | 2.87   |        | 2.03   |
| TC20000401.hg.1          | LINC01272; RP11-290F20.3       | 0.04    |                 |        | 1.67   |        |
| TC04001178.hg.1          | LINC01366                      | 0.04    | 3.33            |        |        |        |
| TC14000500.hg.1          | LINC01366                      | 0.02    | 2.75            |        |        |        |
| TC05000934.hg.1          | LINC01366; CTB-114C7.3         | 0.01    |                 |        |        | 1.78   |
| TC10000629.hg.1          | LIPN                           | 0.01    |                 |        | 8.21   |        |
| TC12002167.hg.1          | LOC100049716                   | 0.03    |                 |        | 1.61   |        |
| TC05002051.hg.1          | LOC100128059;<br>CTB-114C7.4   | 0.02    |                 | 2.69   |        |        |
| TC06004142.hg.1          | LOC100129518;<br>SOD2          | 0.00    |                 |        |        | 1.56   |
| TC06003475.hg.1          | LOC100130357                   | 0.03    |                 | 2.12   |        |        |
| TC01003855.hg.1          | LOC100132062                   | 0.05    |                 |        | 1.75   |        |
| TC16000936.hg.1          | LOC100190986                   | 0.01    |                 |        | 1.55   |        |
| TC10000965.hg.1          | LOC100288619                   | 0.02    |                 |        |        | 1.53   |
| TC01005823.hg.1          | LOC100507670                   | 0.02    |                 | 1.76   |        | 1.71   |
| TC01003222.hg.1          | LOC100507670;<br>RP11-126K1.2  | 0.01    |                 |        |        | 1.51   |
| TC01003401.hg.1          | LOC101927018                   | 0.01    | 1.84            |        |        |        |
| TC04001822.hg.1          | LOC101927018                   | 0.02    | 1.71            |        |        |        |
| TC17000335.hg.1          | LOC101927018                   | 0.04    |                 | 1.64   |        |        |
| TC17002147.hg.1          | LOC101927018                   | 0.03    |                 | 1.56   | 1.69   |        |
| TC10000784.hg.1          | LOC101927472;<br>RP11-127L20.3 | 0.03    |                 |        | 1.50   | 1.96   |
| TC14001195.hg.1          | LOC101927780                   | 0.02    |                 | 1.54   |        |        |
| TC07000677.hg.1          | LOC101927902;<br>RP11-325F22.2 | 0.01    |                 |        | 1.72   |        |
| TC09001436.hg.1          | LOC101928579;<br>RP11-217B7.3  | 0.00    |                 | 1.99   |        | 1.60   |
| TC11002137.hg.1          | LOC101928865                   | 0.02    |                 | 1.99   |        |        |

| Transcript<br>Cluster ID | Gene Symbol                           | p-value | Fold expression |        |        |        |
|--------------------------|---------------------------------------|---------|-----------------|--------|--------|--------|
|                          |                                       |         | PMA             |        | A23187 |        |
|                          |                                       |         | 30 min          | 60 min | 30 min | 60 min |
| TC11003263.hg.1          | LOC101928865                          | 0.01    |                 | 2.20   | 1.72   | 1.59   |
| TC20000598.hg.1          | LOC101929207;<br>RP5-1022P6.4         | 0.00    |                 |        | 1.78   |        |
| TC12002736.hg.1          | LOC101929610                          | 0.00    | 2.14            |        |        |        |
| TC13000182.hg.1          | LOC284454                             | 0.02    | 3.22            |        |        |        |
| TC19002349.hg.1          | LOC284454                             | 0.00    |                 | 1.82   | 2.84   | 2.96   |
| TC01004218.hg.1          | LOC284513                             | 0.00    |                 |        |        | 1.58   |
| TC08002252.hg.1          | LOC286058                             | 0.00    |                 | 2.55   |        | 4.09   |
| TC11000545.hg.1          | LOC399900                             | 0.03    |                 | 2.23   | 1.94   | 2.04   |
| TC14001010.hg.1          | LOC647859                             | 0.03    | 1.54            |        |        |        |
| TC08002253.hg.1          | LOC728445                             | 0.04    | 4.56            |        |        |        |
| TC08002305.hg.1          | LOC728445                             | 0.01    |                 | 3.88   | 3.83   | 3.20   |
| TC04002882.hg.1          | LOC731424                             | 0.00    |                 |        |        | 1.63   |
| TC04001811.hg.1          | LOC731424; RP11-<br>701P16.5          | 0.01    |                 |        |        | 1.81   |
| TC06002446.hg.1          | LST1                                  | 0.03    |                 |        | 2.46   |        |
| TC06003347.hg.1          | LTB                                   | 0.03    |                 |        | 2.90   |        |
| TC01003998.hg.1          | LYST-AS1                              | 0.04    |                 |        | 2.82   |        |
| TC12000611.hg.1          | LYZ                                   | 0.01    |                 |        | 2.03   |        |
| TC22000297.hg.1          | MAFF                                  | 0.00    |                 |        |        | 1.56   |
| TC14001120.hg.1          | MAP4K5                                | 0.03    |                 | 1.61   |        |        |
| TC19000128.hg.1          | MCOLN1                                | 0.03    |                 |        | 2.29   |        |
| TC0X001525.hg.1          | MECP2                                 | 0.04    |                 |        | 1.65   |        |
| TC17000959.hg.1          | METRNL                                | 0.02    |                 |        |        | 1.67   |
| TC0X000111.hg.1          | MGC12916                              | 0.03    | 1.97            |        |        |        |
| TC17000166.hg.1          | MGC12916                              | 0.03    |                 |        | 5.33   |        |
| TC0X000180.hg.1          | MID1IP1                               | 0.05    |                 |        | 1.95   |        |
| TC0X000985.hg.1          | MIR221                                | 0.01    |                 | 3.39   |        | 3.05   |
| TC0X000986.hg.1          | MIR222                                | 0.00    |                 | 3.09   |        | 2.72   |
| TC0X000356.hg.1          | MIR223                                | 0.05    |                 |        | 2.99   |        |
| TC17000983.hg.1          | MIR22HG; MIR22                        | 0.04    |                 |        |        | 1.52   |
| TC07000773.hg.1          | MIR23A<br>MIR23A; MIR24-2;<br>MIR27A; | 0.02    | 2.48            |        |        |        |
| TC19001224.hg.1          | LOC284454                             | 0.00    |                 |        | 2.59   | 2.95   |
| TC09000416.hg.1          | MIR3153                               | 0.02    |                 |        |        | 1.74   |
| TC09002503.hg.1          | MIR3153                               | 0.03    | 2.46            |        |        |        |
| TC0X000007.hg.1          | MIR3690                               | 0.01    |                 |        | 2.98   |        |
| TC04001812.hg.1          | MIR3945                               | 0.01    |                 |        | 2.04   | 2.01   |
| TC0X001529.hg.1          | MIR4308                               | 0.03    | 1.54            |        |        |        |
| TC02000369.hg.1          | MIR4434                               | 0.00    |                 |        |        | 1.65   |
| TC17001883.hg.1          | MIR4738                               | 0.00    |                 |        | 10.54  | 11.98  |
| TC04001138.hg.1          | MIR4802                               | 0.02    |                 |        |        | 1.80   |
| TC04000563.hg.1          | MIR576                                | 0.02    |                 |        | 1.76   |        |

| Transcript<br>Cluster ID | Gene Symbol    | p-value | Fold expression |        |        |        |
|--------------------------|----------------|---------|-----------------|--------|--------|--------|
|                          |                |         | PMA             |        | A23187 |        |
|                          |                |         | 30 min          | 60 min | 30 min | 60 min |
| TC02000266.hg.1          | MIR616         | 0.03    | 15.65           |        |        |        |
| TC13000355.hg.1          | MIR623         | 0.03    |                 |        |        | 1.60   |
| TC20000363.hg.1          | MMP9           | 0.04    |                 |        | 2.34   |        |
| TC17002717.hg.1          | MTVR2          | 0.04    |                 |        |        | 1.63   |
| TC21000189.hg.1          | MX1            | 0.00    |                 | 1.81   |        |        |
| TC21000739.hg.1          | MX1            | 0.00    |                 | 3.43   |        |        |
| TC03000187.hg.1          | MYD88          | 0.04    |                 |        | 2.08   |        |
| TC05000831.hg.1          | NDST1          | 0.01    |                 |        | 1.63   |        |
| TC12000113.hg.1          | NECAP1         | 0.05    |                 |        | 2.96   |        |
| TC06001552.hg.1          | NELFE; MIR1236 | 0.00    |                 |        | 1.56   |        |
| TC6_cox_hap2000180.hg.1  | NELFE; MIR1236 | 0.00    |                 |        | 1.50   |        |
| TC6_dbb_hap3000169.hg.1  | NELFE; MIR1236 | 0.00    |                 |        | 1.50   |        |
| TC6_mcf_hap5000155.hg.1  | NELFE; MIR1236 | 0.00    |                 |        | 1.50   |        |
| TC6_qbl_hap6000170.hg.1  | NELFE; MIR1236 | 0.00    |                 |        | 1.50   |        |
| TC6_ssto_hap7000148.hg.1 | NELFE; MIR1236 | 0.00    |                 |        | 1.50   |        |
| TC06001548.hg.1          | NEU1           | 0.00    |                 |        |        | 2.45   |
| TC6_apd_hap1000089.hg.1  | NEU1           | 0.00    |                 |        |        | 2.45   |
| TC6_cox_hap2000175.hg.1  | NEU1           | 0.00    |                 |        |        | 2.43   |
| TC6_dbb_hap3000164.hg.1  | NEU1           | 0.00    |                 |        |        | 2.45   |
| TC6_mann_hap4000146.hg.1 | NEU1           | 0.00    |                 |        |        | 2.45   |
| TC6_mcf_hap5000150.hg.1  | NEU1           | 0.00    |                 |        |        | 2.45   |
| TC6_qbl_hap6000165.hg.1  | NEU1           | 0.00    |                 |        |        | 2.45   |
| TC6_ssto_hap7000144.hg.1 | NEU1           | 0.00    |                 |        |        | 2.45   |
| TC09001325.hg.1          | NFIL3          | 0.02    |                 |        | 4.31   | 2.86   |
| TC19001457.hg.1          | NFKBID         | 0.02    |                 |        |        | 1.50   |
| TC0X000393.hg.1          | NHSL2          | 0.04    |                 |        | 2.62   |        |
| TC16000442.hg.1          | NOD2           | 0.03    |                 |        | 1.76   |        |
| TC16001549.hg.1          | NOD2           | 0.02    |                 |        | 1.99   |        |
| TC16000180.hg.1          | NOMO1          | 0.05    |                 |        | 1.83   |        |
| TC16000912.hg.1          | NOMO2          | 0.04    |                 |        | 1.86   |        |
| TC16000194.hg.1          | NOMO3; NOMO2   | 0.05    |                 |        | 1.89   |        |
| TC17001954.hg.1          | NPLOC4         | 0.03    |                 |        | 1.81   |        |
| TC06004062.hg.1          | NQO2           | 0.03    |                 |        | 1.83   |        |
| TC01003765.hg.1          | NR4A1          | 0.02    | 1.66            |        |        |        |
| TC12000414.hg.1          | NR4A1          | 0.00    |                 | 1.81   | 2.01   | 1.98   |



| Transcript<br>Cluster ID | Gene Symbol | p-value | Fold expression |        |        |        |
|--------------------------|-------------|---------|-----------------|--------|--------|--------|
|                          |             |         | PMA             |        | A23187 |        |
|                          |             |         | 30 min          | 60 min | 30 min | 60 min |
| TC02002445.hg.1          | NR4A2       | 0.01    |                 |        | 3.55   | 3.78   |
| TC01000226.hg.1          | NR4A3       | 0.02    | 6.37            |        |        |        |
| TC08001246.hg.1          | NSMAF       | 0.00    |                 | 1.83   |        |        |
| TC15000547.hg.1          | NSMAF       | 0.01    | 1.98            |        |        |        |
| TC12002572.hg.1          | OAS1        | 0.03    |                 |        |        | 2.00   |
| TC12000414.hg.1          | OCLM        | 0.03    | 1.94            |        |        |        |
| TC03001071.hg.1          | OLR1        | 0.00    | 2.23            |        |        |        |
| TC12001216.hg.1          | OLR1        | 0.00    |                 | 5.87   | 5.80   | 6.18   |
| TC14000873.hg.1          | OR4K14      | 0.04    |                 |        |        | 1.78   |
| TC09002907.hg.1          | ORM1        | 0.05    |                 | 1.72   |        | 1.57   |
| TC09002906.hg.1          | ORM2        | 0.03    |                 | 1.71   |        |        |
| TC17001331.hg.1          | OSM         | 0.00    | 6.87            |        |        |        |
| TC22000648.hg.1          | OSM         | 0.00    |                 | 5.06   | 4.18   | 3.80   |
| TC14000131.hg.1          | OXA1L       | 0.05    |                 |        | 1.64   |        |
| TC0X000427.hg.1          | P2RY10      | 0.00    |                 | 2.06   |        |        |
| TC03001904.hg.1          | P2RY14      | 0.01    |                 | 1.59   |        |        |
| TC01000232.hg.1          | PADI4       | 0.01    |                 |        | 2.11   |        |
| TC21000401.hg.1          | PAXBP1      | 0.04    |                 |        |        | 1.64   |
| TC21000401.hg.1          | PAXBP1      | 0.05    |                 | 2.21   |        |        |
| TC21000925.hg.1          | PAXBP1      | 0.04    |                 | 2.84   |        |        |
| TC07001618.hg.1          | PDK4        | 0.05    |                 |        |        | 2.11   |
| TC19001640.hg.1          | PGLYRP1     | 0.00    |                 |        | 1.59   |        |
| TC0X001993.hg.1          | PIGA        | 0.02    |                 |        |        | 1.50   |
| TC04001376.hg.1          | PIGY; PYURF | 0.02    |                 |        |        | 1.50   |
| TC10000475.hg.1          | PLAU        | 0.04    |                 | 3.90   |        |        |
| TC19000545.hg.1          | PLEKHG2     | 0.02    |                 |        |        | 1.58   |
| TC17000226.hg.1          | PLIN2       | 0.02    | 11.81           |        |        |        |
| TC17001231.hg.1          | PLIN2       | 0.03    | 7.83            |        |        |        |
| TC01000566.hg.1          | PLK3        | 0.04    |                 |        |        | 1.75   |
| TC0X000267.hg.1          | PLP2        | 0.04    |                 |        | 1.87   |        |
| TC12002519.hg.1          | PLXNC1      | 0.05    |                 |        | 2.43   |        |
| TC18000213.hg.1          | PMAIP1      | 0.04    |                 |        | 3.83   | 2.65   |
| TC18000741.hg.1          | PMAIP1      | 0.05    |                 | 3.57   |        |        |
| TC07001666.hg.1          | PMS2P1      | 0.02    |                 |        | 1.61   |        |
| TC07003082.hg.1          | PMS2P1      | 0.02    |                 |        | 1.70   |        |
| TC14000056.hg.1          | PNP         | 0.03    |                 | 1.95   |        |        |
| TC19002396.hg.1          | PNP         | 0.03    | 2.47            |        |        |        |
| TC06000526.hg.1          | PNPLA1      | 0.01    |                 |        | 1.51   |        |
| TC07003301.hg.1          | PNPLA8      | 0.05    |                 |        |        | 1.72   |
| TC07001470.hg.1          | POLR2J4     | 0.02    |                 |        | 2.15   |        |
| TC05000624.hg.1          | PPIF        | 0.04    | 2.71            |        |        |        |
| TC10000566.hg.1          | PPIF        | 0.03    |                 | 3.01   |        |        |

| Transcript<br>Cluster ID     | Gene Symbol   | p-value | Fold expression |        |        |        |
|------------------------------|---------------|---------|-----------------|--------|--------|--------|
|                              |               |         | PMA             |        | A23187 |        |
|                              |               |         | 30 min          | 60 min | 30 min | 60 min |
| TC06000118.hg.1              | PPP1R10       | 0.04    | 3.17            |        |        |        |
| TC06001502.hg.1              | PPP1R10       | 0.04    |                 | 2.06   |        |        |
| TC06002590.hg.1              | PPP1R10       | 0.04    | 3.17            |        |        |        |
| TC09000165.hg.1              | PPP1R10       | 0.04    | 3.17            |        |        |        |
| TC09000508.hg.1              | PPP1R10       | 0.04    | 3.17            |        |        |        |
| TC12000975.hg.1              | PPP1R10       | 0.04    | 3.16            |        |        |        |
| TC18000414.hg.1              | PPP1R10       | 0.04    | 3.16            |        |        |        |
| TC19001224.hg.1              | PPP1R10       | 0.04    | 3.26            |        |        |        |
| TC6_cox_hap2000137<br>.hg.1  | PPP1R10       | 0.04    |                 | 2.02   |        |        |
| TC6_dbb_hap3000126<br>.hg.1  | PPP1R10       | 0.04    |                 | 2.02   |        |        |
| TC6_mann_hap40001<br>15.hg.1 | PPP1R10       | 0.04    |                 | 2.01   |        |        |
| TC6_mcf_hap5000116<br>.hg.1  | PPP1R10       | 0.04    |                 | 2.01   |        |        |
| TC6_qbl_hap6000127.<br>hg.1  | PPP1R10       | 0.04    |                 | 2.02   |        |        |
| TC6_ssto_hap7000118<br>.hg.1 | PPP1R10       | 0.04    |                 | 2.02   |        |        |
| TC19000711.hg.1              | PPP1R15A      | 0.01    |                 |        |        | 2.40   |
| TC01003732.hg.1              | PPP1R15B      | 0.04    |                 |        |        | 2.30   |
| TC03000348.hg.1              | PRKCD         | 0.04    |                 |        | 2.63   |        |
| TC03002349.hg.1              | PRKCD         | 0.04    |                 |        | 3.85   |        |
| TC14001592.hg.1              | PRMT5-AS1     | 0.04    |                 |        | 1.84   |        |
| TC14001592.hg.1              | PRMT5-AS1     | 0.05    |                 |        |        | 2.13   |
| TC04001625.hg.1              | PRMT9; PRMT10 | 0.02    |                 | 2.10   |        |        |
| TC20000051.hg.1              | PRNP          | 0.02    |                 |        |        | 1.53   |
| TC01000641.hg.1              | PRPF38A       | 0.05    |                 |        | 1.87   |        |
| TC11000345.hg.1              | PRR5L         | 0.04    |                 |        | 2.32   |        |
| TC11002632.hg.1              | PRR5L         | 0.05    |                 |        | 1.54   |        |
| TC19000557.hg.1              | PSMC4         | 0.04    |                 |        | 1.92   |        |
| TC08002113.hg.1              | PTCSC1        | 0.04    |                 |        | 1.58   |        |
| TC10000625.hg.1              | PTEN          | 0.05    |                 |        |        | 1.84   |
| TC14000306.hg.1              | PTGER2        | 0.00    |                 |        |        | 2.46   |
| TC05000184.hg.1              | PTGER4        | 0.02    |                 |        |        | 2.70   |
| TC01003638.hg.1              | PTGS2         | 0.01    |                 |        | 2.55   |        |
| TC10000535.hg.1              | PTGS2         | 0.02    | 2.16            |        |        |        |
| TC01003006.hg.1              | PTPN22        | 0.03    |                 | 1.99   |        |        |
| TC10002355.hg.1              | PTPRE         | 0.03    |                 |        | 1.56   |        |
| TC07001347.hg.1              | PURB; MIR4657 | 0.03    |                 |        |        | 1.70   |
| TC13000875.hg.1              | RAB20         | 0.04    |                 |        | 1.64   |        |
| TC09002922.hg.1              | RALGDS        | 0.03    |                 | 2.04   |        |        |
| TC03000762.hg.1              | RASA2-IT1     | 0.05    |                 | 1.65   |        | 1.77   |
| TC04002922.hg.1              | RASGEF1B      | 0.04    |                 |        | 1.61   | 2.76   |

| Transcript<br>Cluster ID | Gene Symbol    | p-value | Fold expression |        |        |        |
|--------------------------|----------------|---------|-----------------|--------|--------|--------|
|                          |                |         | PMA             |        | A23187 |        |
|                          |                |         | 30 min          | 60 min | 30 min | 60 min |
| TC01002289.hg.1          | RCC2           | 0.03    |                 | 1.62   |        |        |
| TC11003206.hg.1          | RELA           | 0.04    |                 |        | 2.33   |        |
| TC11003207.hg.1          | RELA           | 0.04    |                 |        | 1.50   |        |
| TC13000147.hg.1          | RGCC           | 0.00    |                 |        |        | 2.13   |
| TC01001622.hg.1          | RGS1           | 0.03    |                 | 5.26   |        |        |
| TC17002011.hg.1          | RGS1           | 0.01    | 2.69            |        |        |        |
| TC07000476.hg.1          | RHBDD2         | 0.01    |                 |        |        | 1.64   |
| TC02000116.hg.1          | RHOB           | 0.02    |                 |        | 1.82   | 1.77   |
| TC04000242.hg.1          | RHOH           | 0.02    |                 |        |        | 1.70   |
| TC12000699.hg.1          | RNA5SP365      | 0.01    |                 | 1.66   |        |        |
| TC0X000797.hg.1          | RNA5SP498      | 0.04    |                 |        | 1.52   |        |
| TC0Y000114.hg.1          | RNA5SP498      | 0.04    |                 |        | 1.52   |        |
| TC04002415.hg.1          | RNASE2         | 0.04    | 4.64            |        |        |        |
| TC19000647.hg.1          | RNASE3         | 0.04    | 1.78            |        |        |        |
| TC08001120.hg.1          | RNF122         | 0.03    |                 |        |        | 1.59   |
| TC08001600.hg.1          | RNF139-AS1     | 0.00    |                 |        | 2.05   |        |
| TC08002508.hg.1          | RNF139-AS1     | 0.01    |                 |        | 2.41   |        |
| TC01000388.hg.1          | RNU11          | 0.01    |                 |        |        | 2.15   |
| TC22000358.hg.1          | RNU12          | 0.00    |                 |        |        | 2.10   |
| TC14001226.hg.1          | RNU2-14P       | 0.03    |                 | 1.78   |        |        |
| TC02002066.hg.1          | RNU2-63P       | 0.01    |                 |        |        | 1.75   |
| TC03000911.hg.1          | RNU4-38P       | 0.04    |                 | 1.56   |        |        |
| TC08000640.hg.1          | RNU5E-3P       | 0.01    | 1.57            |        |        |        |
| TC01002206.hg.1          | RNU5E-4P       | 0.05    |                 |        |        | 1.84   |
| TC08001642.hg.1          | RNU6-1255P     | 0.04    |                 |        | 2.12   |        |
| TC16001207.hg.1          | RNU6-1262P     | 0.03    |                 |        | 1.50   |        |
| TC04000679.hg.1          | RNU6-531P      | 0.04    |                 |        | 1.70   |        |
| TC10001616.hg.1          | RNU6-780P      | 0.02    | 1.53            |        |        |        |
| TC03001814.hg.1          | RNU6-789P      | 0.02    |                 |        | 1.70   |        |
| TC12001085.hg.1          | RNU7-103P      | 0.05    |                 |        | 3.18   |        |
| TC06002665.hg.1          | RNU7-124P      | 0.00    | 1.57            |        |        |        |
| TC07001484.hg.1          | RNU7-189P      | 0.01    | 1.57            |        |        |        |
| TC01001142.hg.1          | RNVU1-14       | 0.04    |                 |        |        | 1.81   |
| TC01003152.hg.1          | RNVU1-15       | 0.04    |                 |        |        | 1.75   |
| TC01001136.hg.1          | RNVU1-3        | 0.02    |                 |        | 1.53   |        |
| TC01004733.hg.1          | RP11-107M16.2  | 0.02    |                 |        | 1.53   |        |
| TC03000853.hg.1          | RP11-1149M10.2 | 0.01    | 5.92            |        | 1.59   |        |
| TC08000517.hg.1          | RP11-1149M10.2 | 0.02    |                 | 3.06   | 1.56   | 1.51   |
| TC01001521.hg.1          | RP11-160H22.3  | 0.00    |                 |        | 2.71   | 2.70   |
| TC19001402.hg.1          | RP11-160H22.3  | 0.03    | 1.53            |        |        |        |
| TC17001702.hg.1          | RP11-195E2.4   | 0.00    | 1.70            |        |        |        |
| TC07000803.hg.1          | RP11-306G20.1  | 0.01    |                 | 2.02   |        |        |

| Transcript<br>Cluster ID | Gene Symbol                             | p-value | Fold expression |        |        |        |
|--------------------------|-----------------------------------------|---------|-----------------|--------|--------|--------|
|                          |                                         |         | PMA             |        | A23187 |        |
|                          |                                         |         | 30 min          | 60 min | 30 min | 60 min |
| TC08000384.hg.1          | RP11-318K15.2                           | 0.04    |                 |        | 6.73   |        |
| TC13000218.hg.1          | RP11-327P2.5                            | 0.03    |                 |        |        | 1.86   |
| TC08001169.hg.1          | RP11-360L9.7                            | 0.02    |                 |        | 1.75   |        |
| TC08000531.hg.1          | RP11-437J19.1                           | 0.03    | 1.55            |        |        |        |
| TC01001048.hg.1          | RP11-439A17.10                          | 0.01    |                 |        | 1.85   |        |
| TC01003987.hg.1          | RP11-443B7.1                            | 0.01    |                 |        | 2.37   |        |
| TC01001943.hg.1          | RP11-443B7.2                            | 0.03    |                 |        | 1.60   |        |
| TC01001676.hg.1          | RP11-569A11.1                           | 0.04    |                 |        | 1.68   |        |
| TC04000898.hg.1          | RP11-701P16.2                           | 0.02    |                 |        | 1.86   |        |
| TC01005851.hg.1          | RP11-85G21.1                            | 0.01    |                 |        | 1.68   |        |
| TC19002172.hg.1          | RP11-863K10.7                           | 0.03    | 1.78            |        |        |        |
| TC22000317.hg.1          | RP11-95H8.5                             | 0.01    | 1.56            |        |        |        |
| TC02004282.hg.1          | RP11-95K23.5                            | 0.03    | 1.74            |        |        |        |
| TC07000385.hg.1          | RP3-508I15.14                           | 0.04    | 1.66            |        |        |        |
| TC22000306.hg.1          | RP3-508I15.14<br>RP3-508I15.18;         | 0.00    |                 | 1.83   |        |        |
| TC22000305.hg.1          | RP3-508I15.19                           | 0.04    |                 | 1.77   |        |        |
| TC0X001846.hg.1          | RP4-562J12.2                            | 0.04    |                 |        |        | 1.63   |
| TC01000207.hg.1          | RP4-798A10.2                            | 0.02    |                 |        | 1.65   |        |
| TC02001763.hg.1          | RPL9                                    | 0.04    | 1.57            |        |        |        |
| TC09002418.hg.1          | RPS26                                   | 0.00    | 2.29            |        |        |        |
| TC15001878.hg.1          | RPS26                                   | 0.01    | 3.89            |        |        |        |
|                          | RPS26;<br>LOC100996747;<br>LOC101929876 |         |                 |        |        |        |
| TC12000500.hg.1          | LOC101929876                            | 0.01    |                 | 2.02   |        |        |
| TC10000988.hg.1          | RPS26P11                                | 0.04    | 1.57            |        |        |        |
| TC20000885.hg.1          | RPS2P7                                  | 0.04    |                 |        |        | 1.50   |
| TC19000964.hg.1          | RPS5                                    | 0.04    |                 |        |        | 1.64   |
| TC19000875.hg.1          | RPS9                                    | 0.01    |                 |        | 1.53   |        |
| TC19002231.hg.1          | RPS9                                    | 0.03    |                 |        |        | 1.60   |
| TC09000089.hg.1          | RRAGA                                   | 0.03    |                 |        |        | 1.66   |
| TC16001474.hg.1          | RRN3P2                                  | 0.01    |                 | 1.55   |        |        |
| TC02000034.hg.1          | RSAD2                                   | 0.00    |                 | 3.72   |        |        |
| TC02003008.hg.1          | RSAD2                                   | 0.02    | 1.83            | 3.32   |        |        |
| TC21000946.hg.1          | RUNX1-IT1                               | 0.05    |                 |        | 3.35   |        |
| TC19000541.hg.1          | SAMD4B                                  | 0.02    |                 |        | 1.67   |        |
| TC07001467.hg.1          | SBDS                                    | 0.03    |                 |        |        | 2.13   |
| TC07000428.hg.1          | SBDSP1                                  | 0.05    |                 |        |        | 1.96   |
| TC17000979.hg.1          | SCARF1                                  | 0.03    |                 |        | 1.52   |        |
| TC10000541.hg.1          | SDAD1P1                                 | 0.01    | 2.17            |        |        |        |
| TC09000416.hg.1          | SDF2                                    | 0.04    | 2.42            |        |        |        |
| TC09001733.hg.1          | SEC16A                                  | 0.05    |                 |        |        | 1.61   |
| TC22000421.hg.1          | SELO                                    | 0.04    |                 |        |        | 1.54   |

| Transcript<br>Cluster ID     | Gene Symbol | p-value | Fold expression |        |        |        |
|------------------------------|-------------|---------|-----------------|--------|--------|--------|
|                              |             |         | PMA             |        | A23187 |        |
|                              |             |         | 30 min          | 60 min | 30 min | 60 min |
| TC15001643.hg.1              | SEMA7A      | 0.02    |                 | 1.63   |        | 2.33   |
| TC09002507.hg.1              | SERF2       | 0.05    | 1.64            |        |        |        |
| TC20000867.hg.1              | SERINC3     | 0.05    |                 |        | 2.22   |        |
| TC06001220.hg.1              | SERPINB9    | 0.02    |                 |        | 5.56   |        |
| TC22000650.hg.1              | SF3A1       | 0.04    |                 |        | 2.09   |        |
| TC10001017.hg.1              | SFMBT2      | 0.00    |                 | 1.58   |        |        |
| TC06002126.hg.1              | SGK1        | 0.02    |                 |        |        | 1.84   |
| TC03001380.hg.1              | SHISA5      | 0.03    |                 |        |        | 1.52   |
| TC03001901.hg.1              | SIAH2       | 0.00    |                 |        |        | 1.61   |
| TC21000506.hg.1              | SIK1        | 0.02    |                 |        | 1.54   |        |
| TC03000917.hg.1              | SKIL        | 0.05    |                 | 3.98   |        |        |
| TC02001300.hg.1              | SLC11A1     | 0.03    |                 |        | 1.87   |        |
| TC17001820.hg.1              | SLC16A6     | 0.04    |                 |        | 3.56   |        |
| TC17000780.hg.1              | SLC16A6P1   | 0.04    |                 |        | 3.32   |        |
| TC01000905.hg.1              | SLC30A7     | 0.05    |                 | 1.69   |        |        |
| TC12001426.hg.1              | SLC38A1     | 0.04    |                 | 2.05   | 1.61   |        |
| TC11000567.hg.1              | SLC3A2      | 0.02    |                 | 1.57   |        |        |
| TC11002708.hg.1              | SLC3A2      | 0.03    |                 | 2.44   |        |        |
| TC11003482.hg.1              | SLC43A3     | 0.03    |                 | 1.64   |        |        |
| TC04001810.hg.1              | SLED1       | 0.03    |                 |        | 4.75   | 2.94   |
| TC04002881.hg.1              | SLED1       | 0.03    |                 |        | 6.06   | 3.31   |
| TC04002881.hg.1              | SLED1       | 0.00    |                 |        |        |        |
| TC16001211.hg.1              | SMPD3       | 0.04    |                 |        |        | 1.76   |
| TC20000395.hg.1              | SNAI1       | 0.00    |                 |        | 1.58   |        |
| TC13000632.hg.1              | SNORA31     | 0.04    |                 |        | 3.45   | 2.45   |
| TC06000375.hg.1              | SNORA38     | 0.04    |                 | 1.58   | 1.54   |        |
| TC6_cox_hap2000071<br>.hg.1  | SNORA38     | 0.04    |                 | 1.58   | 1.54   |        |
| TC6_mann_hap40000<br>62.hg.1 | SNORA38     | 0.04    |                 | 1.58   | 1.54   |        |
| TC6_qbl_hap6000062.<br>hg.1  | SNORA38     | 0.04    |                 | 1.58   | 1.54   |        |
| TC6_ssto_hap7000058<br>.hg.1 | SNORA38     | 0.04    |                 | 1.58   | 1.54   |        |
| TC14000709.hg.1              | SNORD114-29 | 0.03    |                 |        |        | 1.50   |
| TC06003807.hg.1              | SNORD37     | 0.03    | 3.48            |        |        |        |
| TC17000230.hg.1              | SNORD3A     | 0.01    |                 |        |        | 4.79   |
| TC17002061.hg.1              | SNORD3A     | 0.04    | 2.06            |        |        |        |
| TC02004973.hg.1              | SNORD3B-1   | 0.02    | 2.24            |        |        |        |
| TC16000855.hg.1              | SNORD3B-1   | 0.02    | 2.24            |        |        |        |
| TC17000226.hg.1              | SNORD3B-1   | 0.01    |                 |        |        | 4.61   |
| TC17001231.hg.1              | SNORD3B-2   | 0.01    |                 |        |        | 4.61   |
| TC17001238.hg.1              | SNORD3C     | 0.01    |                 |        |        | 4.40   |

| Transcript<br>Cluster ID | Gene Symbol                     | p-value | Fold expression |        |        |        |
|--------------------------|---------------------------------|---------|-----------------|--------|--------|--------|
|                          |                                 |         | PMA             |        | A23187 |        |
|                          |                                 |         | 30 min          | 60 min | 30 min | 60 min |
| TC09000935.hg.1          | SNORD3D                         | 0.01    | 2.18            |        |        |        |
| TC17001233.hg.1          | SNORD3D                         | 0.05    |                 |        | 1.71   |        |
| TC17001233.hg.1          | SNORD3D                         | 0.00    |                 | 3.55   |        | 4.49   |
| TC17000040.hg.1          | SNORD61                         | 0.04    | 1.51            |        |        |        |
| TC03000342.hg.1          | SNORD69                         | 0.05    |                 |        | 1.82   |        |
| TC12000726.hg.1          | SOCS2                           | 0.04    |                 |        |        | 1.52   |
| TC17001917.hg.1          | SOCS3                           | 0.01    |                 |        | 3.59   | 2.52   |
| TC19000787.hg.1          | SPACA6P                         | 0.01    |                 |        | 1.83   |        |
| TC01005360.hg.1          | SPCS2P4                         | 0.03    |                 | 1.50   |        |        |
|                          | SRGAP2;<br>SRGAP2D;<br>SRGAP2B; |         |                 |        |        |        |
| TC01001721.hg.1          | SRGAP2C                         | 0.04    |                 |        |        | 1.54   |
| TC01004687.hg.1          | SRGAP2B                         | 0.05    |                 |        |        | 1.71   |
| TC01000313.hg.1          | SRRM1                           | 0.04    |                 |        | 1.79   |        |
| TC17002792.hg.1          | SRSF2                           | 0.03    |                 |        |        | 1.75   |
| TC17001908.hg.1          | SRSF2; MIR636                   | 0.02    |                 |        |        | 1.73   |
| TC05002109.hg.1          | SRSF3                           | 0.03    | 6.30            |        |        |        |
| TC06000530.hg.1          | SRSF3                           | 0.03    |                 | 2.86   |        |        |
| TC06002757.hg.1          | SRSF3                           | 0.03    |                 | 2.30   |        |        |
| TC15001906.hg.1          | SRSF3                           | 0.03    | 5.15            |        |        |        |
| TC02001757.hg.1          | SRSF7                           | 0.05    |                 |        |        | 1.92   |
| TC07000415.hg.1          | STAG3L4                         | 0.04    |                 |        | 2.25   |        |
| TC07002389.hg.1          | STAG3L4                         | 0.03    |                 |        | 2.14   |        |
| TC01005350.hg.1          | STMN1                           | 0.01    |                 |        |        | 1.50   |
| TC16000367.hg.1          | STX4                            | 0.01    |                 |        | 1.57   | 1.58   |
| TC17000166.hg.1          | SUMO1P1                         | 0.05    | 4.41            |        |        |        |
| TC20000959.hg.1          | SUMO1P1                         | 0.04    |                 | 2.86   |        |        |
| TC06002270.hg.1          | TAGAP                           | 0.05    |                 |        |        | 2.35   |
| TC06003604.hg.1          | TAP2                            | 0.03    |                 |        | 1.66   |        |
|                          | TBC1D7;<br>LOC100130357;        |         |                 |        |        |        |
| TC06001279.hg.1          | RP1-257A7.4                     | 0.00    |                 | 3.14   |        | 1.55   |
|                          | TCTEX1D4; RP11-<br>269F19.9     |         |                 |        |        |        |
| TC01002601.hg.1          |                                 | 0.00    |                 |        |        | 1.75   |
| TC07000718.hg.1          | TES                             | 0.05    |                 | 1.58   |        |        |
| TC13000426.hg.1          | TFDP1                           | 0.02    |                 | 1.83   | 2.35   |        |
| TC13001318.hg.1          | TFDP1                           | 0.02    |                 | 2.31   | 3.85   |        |
| TC12003253.hg.1          | THAP2                           | 0.03    |                 |        |        | 1.60   |
| TC04002943.hg.1          | THAP9-AS1                       | 0.04    |                 |        | 1.91   |        |
| TC04002943.hg.1          | THAP9-AS1                       | 0.03    |                 |        |        | 2.05   |
| TC15000270.hg.1          | THBS1                           | 0.01    |                 | 3.73   | 3.23   |        |
| TC22000728.hg.1          | THBS1                           | 0.00    | 3.99            |        |        |        |
| TC0X000238.hg.1          | TIMP1                           | 0.00    |                 |        | 2.96   |        |

| Transcript<br>Cluster ID     | Gene Symbol                  | p-value | Fold expression |        |        |        |
|------------------------------|------------------------------|---------|-----------------|--------|--------|--------|
|                              |                              |         | PMA             |        | A23187 |        |
|                              |                              |         | 30 min          | 60 min | 30 min | 60 min |
| TC02001586.hg.1              | TIPARP                       | 0.02    | 2.50            |        |        |        |
| TC03000853.hg.1              | TIPARP                       | 0.00    |                 | 2.20   |        |        |
| TC20000207.hg.1              | TM9SF4                       | 0.02    |                 |        | 2.91   |        |
| TC14001318.hg.1              | TMED10                       | 0.03    |                 |        | 1.80   |        |
| TC17001845.hg.1              | TMEM55B                      | 0.04    | 4.96            |        |        |        |
| TC17000118.hg.1              | TMEM88                       | 0.00    |                 | 1.87   | 1.60   | 1.55   |
| TC17001884.hg.1              | TMEM88                       | 0.01    | 2.20            |        |        |        |
| TC17000565.hg.1              | TMUB2                        | 0.03    |                 |        | 1.67   |        |
| TC11003449.hg.1              | TMX2                         | 0.01    |                 |        | 1.57   |        |
| TC06000371.hg.1              | TNF                          | 0.00    |                 |        |        | 2.13   |
| TC06002714.hg.1              | TNF                          | 0.00    |                 |        |        | 2.45   |
| TC6_apd_hap1000036<br>.hg.1  | TNF                          | 0.01    |                 |        |        | 2.40   |
| TC6_cox_hap2000067<br>.hg.1  | TNF                          | 0.00    |                 |        |        | 2.13   |
| TC6_dbb_hap3000058<br>.hg.1  | TNF                          | 0.00    |                 |        |        | 2.13   |
| TC6_mann_hap40000<br>59.hg.1 | TNF                          | 0.00    |                 |        |        | 2.13   |
| TC6_mcf_hap5000053<br>.hg.1  | TNF                          | 0.00    |                 |        |        | 2.13   |
| TC6_qbl_hap6000058.<br>hg.1  | TNF                          | 0.00    |                 |        |        | 2.13   |
| TC6_ssto_hap7000054<br>.hg.1 | TNF                          | 0.00    |                 |        |        | 2.13   |
| TC05001946.hg.1              | TNIP1                        | 0.04    |                 |        | 2.72   |        |
| TC05003310.hg.1              | TNIP1                        | 0.01    |                 |        | 1.55   |        |
| TC09000237.hg.1              | TPP1                         | 0.05    | 2.49            |        |        |        |
| TC06001717.hg.1              | TREM1                        | 0.04    |                 |        | 2.04   |        |
| TC06001732.hg.1              | TRERF1                       | 0.05    |                 |        |        | 1.54   |
| TC08000733.hg.1              | TRIB1                        | 0.03    |                 |        |        | 2.43   |
| TC03000814.hg.1              | TSC22D2                      | 0.04    |                 |        |        | 1.81   |
| TC21000341.hg.1              | TTN                          | 0.05    | 1.85            |        |        |        |
| TC21000501.hg.1              | U2AF1                        | 0.04    |                 |        |        | 1.57   |
| TC13001250.hg.1              | UBAC2                        | 0.04    |                 |        | 2.33   |        |
| TC13000353.hg.1              | UBAC2-IT1; RP11-<br>461N23.5 | 0.04    |                 |        | 2.04   |        |
| TC01004756.hg.1              | UBAP2L                       | 0.04    |                 |        | 1.94   |        |
| TC12001625.hg.1              | UBAP2L                       | 0.04    | 3.30            |        |        |        |
| TC11002074.hg.1              | UCP2                         | 0.03    |                 |        |        | 1.90   |
| TC11001999.hg.1              | UNC93B1                      | 0.05    |                 |        |        | 1.52   |
| TC17002787.hg.1              | UNK                          | 0.00    |                 | 2.22   | 2.66   | 1.89   |
| TC22000149.hg.1              | UPB1                         | 0.05    |                 |        | 2.04   |        |
| TC17001922.hg.1              | USP36                        | 0.00    |                 |        | 1.53   |        |
| TC11002105.hg.1              | UTS2                         | 0.04    | 1.77            |        |        |        |
| TC06000608.hg.1              | VEGFA                        | 0.03    |                 | 2.07   |        |        |



| Transcript<br>Cluster ID | Gene Symbol            | p-value | Fold expression |        |        |        |
|--------------------------|------------------------|---------|-----------------|--------|--------|--------|
|                          |                        |         | PMA             |        | A23187 |        |
|                          |                        |         | 30 min          | 60 min | 30 min | 60 min |
| TC07001397.hg.1          | VOPPI;<br>LOC101060281 | 0.03    |                 |        | 1.57   |        |
| TC0X000905.hg.1          | VPS13A                 | 0.04    | 1.51            |        |        |        |
| TC15000297.hg.1          | VPS18                  | 0.03    |                 | 2.19   |        |        |
| TC17001984.hg.1          | WDR45B;<br>WDR45L      | 0.04    |                 |        | 2.09   |        |
| TC17000309.hg.1          | WSB1                   | 0.05    |                 | 2.51   |        |        |
| TC08001135.hg.1          | XX-FW83128A1.2         | 0.02    | 2.46            |        |        |        |
| TC0X001529.hg.1          | XX-FW83128A1.2         | 0.02    |                 | 2.07   |        |        |
| TC02004620.hg.1          | ZEB2                   | 0.05    |                 | 1.78   |        |        |
| TC14001153.hg.1          | ZFP36                  | 0.03    | 2.50            |        |        |        |
| TC19000544.hg.1          | ZFP36                  | 0.01    |                 | 1.80   | 1.85   | 2.90   |
| TC14001253.hg.1          | ZFP36L1                | 0.04    |                 |        | 2.15   |        |
| TC02001790.hg.1          | ZFP36L2                | 0.04    |                 |        | 2.31   |        |
| TC03002737.hg.1          | ZNF107                 | 0.05    | 2.54            |        |        |        |
| TC07000385.hg.1          | ZNF107                 | 0.00    |                 |        | 2.74   | 1.81   |
| TC0X001202.hg.1          | ZNF107                 | 0.02    | 4.13            |        |        |        |
| TC06000273.hg.1          | ZNF165                 | 0.01    |                 |        | 2.66   | 2.11   |
| TC08000866.hg.1          | ZNF252P-AS1            | 0.05    |                 |        | 1.51   |        |
| TC19000544.hg.1          | ZNF638-IT1             | 0.04    | 1.50            |        |        |        |
| TC0X000219.hg.1          | ZNF674-AS1             | 0.04    |                 |        | 2.17   |        |
| TC19002391.hg.1          | ZNF708                 | 0.02    |                 |        | 2.29   |        |
| TC19000390.hg.1          | ZNF738                 | 0.04    |                 |        | 1.69   |        |
| TC06000274.hg.1          | ZSCAN12P1              | 0.05    |                 | 2.08   |        |        |
| TC06002667.hg.1          | ZSCAN12P1              | 0.04    |                 | 1.50   |        |        |

Table S3. Number of connected transcripts regulated by specific transcription factors

| Transcription factors | PMA -induced NOX<br>-dependent NETosis |        | A23187 -induced NOX<br>-independent NETosis |        |
|-----------------------|----------------------------------------|--------|---------------------------------------------|--------|
|                       | 30 min                                 | 60 min | 30 min                                      | 60 min |
| Androgen receptor     | 16                                     |        | 55                                          | 16     |
| ATF-2/c-JUN           |                                        | 23     |                                             |        |
| C/EBP                 |                                        |        | 52                                          |        |
| c-Myc                 | 26                                     | 38     | 78                                          | 26     |
| EGR1                  | 9                                      | 18     | 49                                          | 9      |
| ESR1 (nuclear)        |                                        | 24     |                                             |        |
| HIF1A                 |                                        | 20     | 54                                          |        |
| IRF1                  |                                        |        | 49                                          |        |
| NF-kB                 | 10                                     | 14     | 57                                          | 16     |
| P53                   | 10                                     | 28     |                                             | 10     |
| PPAR-b                | 9                                      |        |                                             | 13     |
| PPAR-gamma            |                                        | 17     |                                             |        |
| PU.1                  |                                        |        | 59                                          |        |
| RAR-a                 |                                        |        | 66                                          |        |
| SP1                   |                                        |        | 64                                          |        |
| STAT1                 |                                        | 17     |                                             |        |
| STAT3                 | 10                                     | 21     | 53                                          |        |
| STAT3                 |                                        |        |                                             |        |
| STAT3                 |                                        |        |                                             |        |
| STAT5                 |                                        |        | 48                                          |        |
| TCF                   |                                        |        |                                             | 10     |
| TCF7L2 (TCF4)         | 10                                     | 16     |                                             |        |
